# Supplementary material for: Dysregulated Choline, Methionine, and Aromatic Amino Acid Metabolism in Patients with Wilson Disease: Exploratory Metabolomic Profiling and Implications for Hepatic and Neurologic Phenotypes
Source: MDPI journal article supplement (doi:10.3390/ijms20235937), 2019-11-26

## Supplemental Material

**Figure S1:** Principal component analysis based on all detected metabolites. The first and second principal component scores plot show separation and clustering of WD and HC groups with some overlapping. The explained variances are shown in brackets.

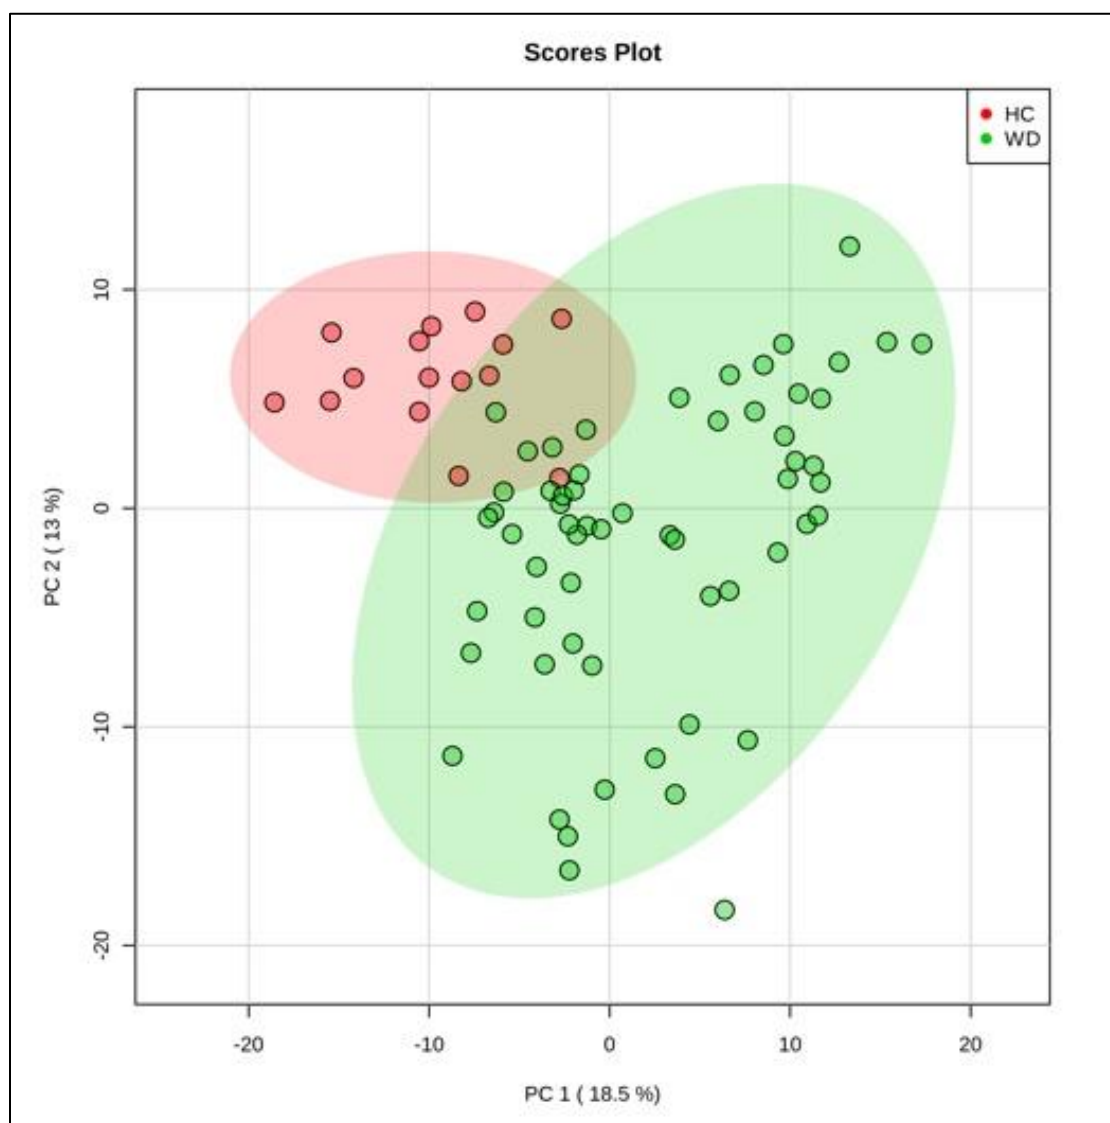

**Figure S2:** Volcano plot for WD compared to HC based on all detected metabolites. Important features selected with fold change (FC) threshold 1.2 and t-test (p) threshold 0.1. Both fold changes and *p*-values are log-transformed. The pink circles represent features above the threshold. The further the circle's position away from (0,0), the more significant the feature.

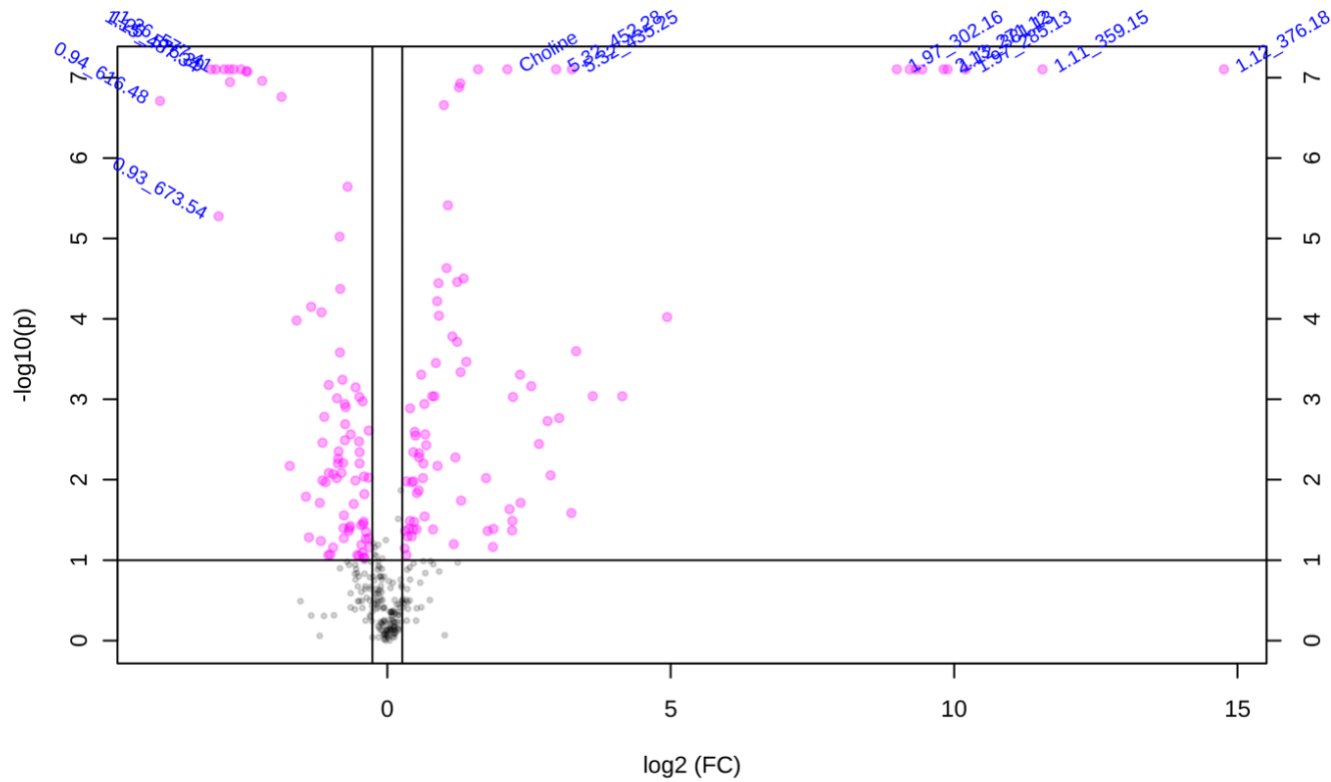

**Table S1:** Comprehensive list of differential metabolites comparing WD to HC. Significant metabolites were selected by volcano plot with fold change (FC) >1.2 and FDR-adjusted  $p < 0.1$  indicating significance.

| Metabolite Name/Identifier | InChI Key                   | FC      | log2 (FC) | FDR $p$ -value | $-\log_{10}(p)$ | Species                             | m/z      | RT   |
|----------------------------|-----------------------------|---------|-----------|----------------|-----------------|-------------------------------------|----------|------|
| 1.97_307.11                | NA                          | 594.48  | 9.2155    | 1.00E-73       | 72.998          | [M+H] <sup>+</sup>                  | 307.1147 | 1.97 |
| 1.97_285.13                | NA                          | 1176.9  | 10.201    | 7.06E-64       | 63.151          | [M+H-H <sub>2</sub> O] <sup>+</sup> | 285.1333 | 1.97 |
| 2.12_293.10                | NA                          | 640.54  | 9.3232    | 8.09E-64       | 63.092          | [2M+H] <sup>+</sup>                 | 293.0991 | 2.12 |
| 1.11_359.15                | NA                          | 3018.3  | 11.56     | 2.28E-59       | 58.643          | [M+H] <sup>+</sup>                  | 359.152  | 1.11 |
| 1.12_376.18                | NA                          | 27746   | 14.76     | 3.83E-58       | 57.417          | [M+H] <sup>+</sup>                  | 376.1759 | 1.12 |
| 2.13_271.12                | NA                          | 900.89  | 9.8152    | 2.70E-57       | 56.569          | [2M+H] <sup>+</sup>                 | 271.1173 | 2.13 |
| 2.13_288.14                | NA                          | 694.27  | 9.4394    | 8.44E-57       | 56.074          | [M+H] <sup>+</sup>                  | 288.1439 | 2.13 |
| 1.97_302.16                | NA                          | 508.34  | 8.9897    | 8.00E-56       | 55.097          | [M+H] <sup>+</sup>                  | 302.1595 | 1.97 |
| 1.12_381.13                | NA                          | 932.02  | 9.8642    | 2.78E-36       | 35.555          | [M+Na] <sup>+</sup>                 | 381.1296 | 1.12 |
| 5.32_435.25                | NA                          | 9.5686  | 3.2583    | 2.56E-20       | 19.591          | [M-H] <sup>-</sup>                  | 435.2497 | 5.32 |
| 5.31_104.11                | NA                          | 3.0336  | 1.601     | 1.87E-17       | 16.729          | [M+H] <sup>+</sup>                  | 104.1061 | 5.31 |
| 1.21_531.37                | NA                          | 0.15263 | -2.7119   | 5.34E-16       | 15.272          | [M+H] <sup>+</sup>                  | 531.368  | 1.21 |
| Choline                    | OEYIOHPDSNJKLS-UHFFFAOYSA-N | 4.3424  | 2.1185    | 8.76E-16       | 15.058          | [M+H] <sup>+</sup>                  | 104.1066 | 5.12 |
| 5.32_452.28                | NA                          | 7.8835  | 2.9788    | 9.66E-15       | 14.015          | [M-H] <sup>-</sup>                  | 452.2765 | 5.32 |
| 0.94_616.48                | NA                          | 0.06208 | -4.0097   | 7.96E-14       | 13.099          | [M+H] <sup>+</sup>                  | 616.4769 | 0.94 |
| 1.26_577.41                | NA                          | 0.13579 | -2.8805   | 2.78E-13       | 12.557          | [M+H] <sup>+</sup>                  | 577.4071 | 1.26 |
| 1.25_575.39                | NA                          | 0.12284 | -3.0252   | 4.11E-13       | 12.386          | [M+H] <sup>+</sup>                  | 575.3942 | 1.25 |
| Phenylalanine              | COLNVLDHVKWLRT-QMMMGPBSA-N  | 2.4421  | 1.2881    | 2.79E-12       | 11.554          | [M+H] <sup>+</sup>                  | 166.0862 | 6.61 |
| 2-Hydroxy carbamazepine    | NA                          | 2.403   | 1.2649    | 3.19E-12       | 11.496          | [M+H] <sup>+</sup>                  | 253.0974 | 1.24 |
| 1.16_489.36                | NA                          | 0.27424 | -1.8665   | 4.03E-12       | 11.395          | [M+H] <sup>+</sup>                  | 489.3574 | 1.16 |
| 6.61_149.06                | NA                          | 1.9985  | 0.99891   | 4.96E-11       | 10.305          | [M-H] <sup>-</sup>                  | 149.0589 | 6.61 |
| 0.93_672.54                | NA                          | 0.14607 | -2.7752   | 6.42E-11       | 10.192          | [M+H] <sup>+</sup>                  | 672.5381 | 0.93 |
| 1.23_533.38                | NA                          | 0.18064 | -2.4688   | 2.06E-10       | 9.6861          | [M+H] <sup>+</sup>                  | 533.3839 | 1.23 |
| 0.93_673.54                | NA                          | 0.12712 | -2.9757   | 6.32E-10       | 9.1991          | [M+H] <sup>+</sup>                  | 673.5387 | 0.93 |
| 1.15_487.34                | NA                          | 0.11591 | -3.109    | 8.29E-09       | 8.0815          | [M-H] <sup>-</sup>                  | 487.3427 | 1.15 |
| 1.26_555.40                | NA                          | 0.16726 | -2.5799   | 6.00E-08       | 7.222           | [M+NH <sub>4</sub> ] <sup>+</sup>   | 555.3977 | 1.26 |
| 1.23_553.38                | NA                          | 0.14464 | -2.7895   | 1.52E-07       | 6.8196          | [M+H] <sup>+</sup>                  | 553.3824 | 1.23 |
| 5.56_852.56                | NA                          | 2.0657  | 1.0467    | 2.47E-07       | 6.6072          | [M+H] <sup>+</sup>                  | 852.5609 | 5.56 |
| PC(18:1/14:0)              | KIVAJCJTVPSRJ-OQHNRNOKSA-N  | 1.8408  | 0.88035   | 1.07E-06       | 5.9716          | [M+H] <sup>+</sup>                  | 732.5534 | 4.43 |
| 5.56_835.53                | NA                          | 1.8711  | 0.90387   | 1.07E-06       | 5.9716          | [M+H] <sup>+</sup>                  | 835.5327 | 5.56 |
| 1.21_511.37                | NA                          | 0.21659 | -2.2069   | 1.24E-06       | 5.9057          | [M+H] <sup>+</sup>                  | 511.3718 | 1.21 |
| 5.15_544.34                | NA                          | 0.5586  | -0.84012  | 1.43E-06       | 5.8433          | [M+Na] <sup>+</sup>                 | 544.3397 | 5.15 |
| 1.45_738.49                | NA                          | 0.6154  | -0.7004   | 1.43E-06       | 5.8433          | [M+NH <sub>4</sub> ] <sup>+</sup>   | 738.4926 | 1.45 |
| 0.99_394.35                | NA                          | 30.647  | 4.9377    | 1.43E-06       | 5.8433          | [M+NH <sub>4</sub> ] <sup>+</sup>   | 394.3517 | 0.99 |

|                 |                             |         |          |            |        |                                         |                   |      |
|-----------------|-----------------------------|---------|----------|------------|--------|-----------------------------------------|-------------------|------|
| 5.56_854.57     | NA                          | 2.5438  | 1.347    | 2.98E-06   | 5.5258 | [M+NH4] <sup>+</sup>                    | 854.5748          | 5.56 |
| 5.56_837.55     | NA                          | 2.352   | 1.2339   | 5.34E-06   | 5.2725 | [M+H] <sup>+</sup>                      | 837.5476          | 5.56 |
| Ornithine       | AHLPHDHHMVZTML-BYPYZUCNSA-N | 2.3478  | 1.2313   | 9.17E-06   | 5.0379 | [M+H] <sup>+</sup>                      | 133.0961          | 9.27 |
| PC(14:0/14:0)   | CITHEXJVPOWHKC-UUWRZZSWSA-N | 2.0995  | 1.0701   | 1.13E-05   | 4.9477 | [M+H] <sup>+</sup>                      | 678.5046          | 4.49 |
| 9.27_116.07     | NA                          | 2.2169  | 1.1485   | 3.22E-05   | 4.4922 | [M+H] <sup>+</sup>                      | 116.0696          | 9.27 |
| LysoPC(P-18:0)  | WBOMIOWRFSPZMC-AYICAFKVSA-N | 0.57314 | -0.80303 | 3.23E-05   | 4.4903 | [M+H] <sup>+</sup>                      | 508.3748          | 5.22 |
| 1.18_509.36     | NA                          | 0.17857 | -2.4855  | 5.75E-05   | 4.2404 | [M+H] <sup>+</sup>                      | 509.3562          | 1.18 |
| 3.07_400.34     | NA                          | 2.4515  | 1.2937   | 7.14E-05   | 4.1462 | [M+H] <sup>+</sup>                      | 400.3414          | 3.07 |
| 0.99_377.32     | NA                          | 17.709  | 4.1464   | 7.20E-05   | 4.1424 | [M+H] <sup>+</sup>                      | 377.3205          | 0.99 |
| 0.92_600.50     | NA                          | 0.60122 | -0.73405 | 8.27E-05   | 4.0824 | [M+H] <sup>+</sup>                      | 600.4984          | 0.92 |
| 0.90_610.54     | NA                          | 1.5746  | 0.65502  | 8.51E-05   | 4.0699 | [M+H] <sup>+</sup>                      | 610.5391          | 0.90 |
| Histidine       | HNDVDQJCIGZPNO-YFKPBYRVSA-N | 1.7805  | 0.83231  | 9.31E-05   | 4.0313 | [M+H] <sup>+</sup>                      | 156.0762          | 9.07 |
| Alanine         | QNAYBKMLOCYPGJ-REOHCLBHSA-N | 1.3987  | 0.4841   | 0.00013065 | 3.8839 | [M+H] <sup>+</sup>                      | 90.0542           | 7.79 |
| 1.08_541.45     | NA                          | 0.32984 | -1.6002  | 0.00014455 | 3.84   | [M+H] <sup>+</sup>                      | 541.4482          | 1.08 |
| 0.93_364.27     | NA                          | 5.815   | 2.5398   | 0.00014455 | 3.84   | [M+H] <sup>+</sup>                      | 364.2681          | 0.93 |
| 0.90_611.54     | NA                          | 1.5898  | 0.66887  | 0.00014666 | 3.8337 | [M+H] <sup>+</sup>                      | 611.5373          | 0.90 |
| 2.87_426.36     | NA                          | 4.6498  | 2.2172   | 0.00018085 | 3.7427 | [M+H] <sup>+</sup>                      | 426.3571          | 2.87 |
| 4.30_732.55     | NA                          | 1.8801  | 0.91079  | 0.00028574 | 3.544  | [M+H] <sup>+</sup>                      | 732.5535          | 4.30 |
| 5.13_500.30     | NA                          | 8.1828  | 3.0326   | 0.00028574 | 3.544  | [M+H] <sup>+</sup>                      | 500.303           | 5.13 |
| 1.00_551.55     | NA                          | 10.073  | 3.3324   | 0.00028574 | 3.544  | [M+H] <sup>+</sup>                      | 551.5454          | 1.00 |
| PS(18:0/20:4)   | SVOUGFFDROZBJI-DNALCEECSA-N | 0.39422 | -1.3429  | 0.00031406 | 3.503  | [M+H] <sup>+</sup>                      | 812.5433          | 5.40 |
| LysoPC(15:0)    | RJZVWDTYEWCUAR-JOCHJYFZSA-N | 0.30327 | -1.7213  | 0.00034956 | 3.4565 | [M+H] <sup>+</sup> _[M+Na] <sup>+</sup> | 482.3215_504.3075 | 5.27 |
| 1.09_466.36     | NA                          | 0.4885  | -1.0336  | 0.00034956 | 3.4565 | [M+H] <sup>+</sup>                      | 466.3605          | 1.09 |
| LysoPC(14:0)    | VXUOFDJKYGDUJI-OAQYLSRUSA-N | 0.57791 | -0.79108 | 0.00034956 | 3.4565 | [M+H] <sup>+</sup>                      | 468.3086          | 5.29 |
| SIP             | DUYSYHSSBDVJSM-KRWOKUGFSA-N | 0.67908 | -0.55836 | 0.00034956 | 3.4565 | [M+H] <sup>+</sup>                      | 380.2552          | 5.96 |
| Kynurenine      | YGPSJZOEDVAXAB-QMMMGOBSA-N  | 1.5142  | 0.59854  | 0.00050566 | 3.2961 | [M+H] <sup>+</sup>                      | 209.0914          | 6.62 |
| 5.16_482.32     | NA                          | 0.44705 | -1.1615  | 0.00075461 | 3.1223 | [M+H] <sup>+</sup>                      | 482.3218          | 5.16 |
| LysoPC(24:0)    | SKJMUADLQLZAGH-WJOKGBTCSA-N | 0.74014 | -0.43413 | 0.0010653  | 2.9725 | [M+H] <sup>+</sup>                      | 608.4634          | 5.03 |
| 1.00_549.53     | NA                          | 7.3728  | 2.8822   | 0.0011621  | 2.9348 | [2M+H] <sup>+</sup>                     | 549.5341          | 1.00 |
| Tyrosine        | OUYCCCASQSFEME-QMMMGOBSA-N  | 1.7307  | 0.79133  | 0.0012417  | 2.906  | [M+H] <sup>+</sup>                      | 182.0802          | 7.39 |
| 1.01_507.49     | NA                          | 7.0977  | 2.8274   | 0.0012417  | 2.906  | [2M+H] <sup>+</sup>                     | 507.4856          | 1.01 |
| 0.99_591.58     | NA                          | 0.55183 | -0.85771 | 0.0013086  | 2.8832 | [M+H] <sup>+</sup>                      | 591.5819          | 0.99 |
| PC(18:3/18:3)   | XXKFQTJOJZELMD-JICBSJGISA-N | 0.59446 | -0.75035 | 0.0014346  | 2.8433 | [M+H] <sup>+</sup>                      | 778.5374          | 4.18 |
| 1.14_481.35     | NA                          | 0.45316 | -1.1419  | 0.0019149  | 2.7178 | [M+H] <sup>+</sup>                      | 481.3514          | 1.14 |
| PC(P-18:0/20:4) | FHHVIBPVBBRLOR-IYACIECVSA-N | 1.6094  | 0.68651  | 0.0020141  | 2.6959 | [M+H] <sup>+</sup>                      | 794.6058          | 4.30 |
| 0.99_536.50     | NA                          | 2.3002  | 1.2017   | 0.0020916  | 2.6795 | [M+H] <sup>+</sup>                      | 536.5023          | 0.99 |
| LysoPC(18:1)    | YAMUFBLWGFFICM-PTGWMXDISA-N | 0.79667 | -0.32795 | 0.0022638  | 2.6452 | [M+H] <sup>+</sup>                      | 522.3559          | 5.17 |
| 0.93_347.24     | NA                          | 5.0716  | 2.3424   | 0.0023539  | 2.6282 | [M+H-H <sub>2</sub> O] <sup>+</sup>     | 347.2419          | 0.93 |

|                            |                             |         |          |           |        |                                                         |                       |      |
|----------------------------|-----------------------------|---------|----------|-----------|--------|---------------------------------------------------------|-----------------------|------|
| Proline                    | ONIBWKKTOPOVIA-BYPYZUCNSA-N | 1.4771  | 0.56272  | 0.0025545 | 2.5927 | [M+H] <sup>+</sup>                                      | 116.0696              | 7.44 |
| 4.58_432.31                | NA                          | 6.3961  | 2.6772   | 0.0026054 | 2.5841 | [M+H-H <sub>2</sub> O] <sup>+</sup>                     | 432.3093              | 4.58 |
| 0.89_612.55                | NA                          | 1.8109  | 0.85668  | 0.0028009 | 2.5527 | [M+H] <sup>+</sup>                                      | 612.5537              | 0.89 |
| 1.18_490.37                | NA                          | 0.70748 | -0.49925 | 0.0032195 | 2.4922 | [M+H] <sup>+</sup>                                      | 490.3735              | 1.18 |
| PC(16:1/16:1)              | GPWHCUUIQMDELX-VHQDNGOZSA-N | 0.75181 | -0.41156 | 0.0032737 | 2.485  | [M+H] <sup>+</sup>                                      | 730.5372              | 4.43 |
| 1.01_509.50                | NA                          | 4.4574  | 2.1562   | 0.0032737 | 2.485  | [M+H] <sup>+</sup>                                      | 509.5023              | 1.01 |
| PE(16:0/18:1)              | FHQVHHIBKUMWTI-OTMQOFQLSA-N | 1.4353  | 0.52135  | 0.0041038 | 2.3868 | [M+H] <sup>+</sup>                                      | 718.5372              | 4.58 |
| N.epsilon.-Methyl-L-lysine | PQNASZJZHFPQLE-UHFFFAOYSA-N | 1.8484  | 0.88624  | 0.0041038 | 2.3868 | [M+H] <sup>+</sup>                                      | 161.1275              | 8.99 |
| 1.00_581.24                | NA                          | 0.51665 | -0.95274 | 0.0042745 | 2.3691 | [M+K] <sup>+</sup>                                      | 581.2378              | 1.00 |
| Lyso PAF C-16              | VLBPIWYTPAXCFJ-UHFFFAOYSA-N | 1.3151  | 0.39521  | 0.0043146 | 2.3651 | [M+H] <sup>+</sup>                                      | 482.3582              | 5.27 |
| 5.14_517.33                | NA                          | 12.35   | 3.6265   | 0.0044294 | 2.3537 | [M+H] <sup>+</sup>                                      | 517.3291              | 5.14 |
| LysoPC(16:0)               | NA                          | 1.3057  | 0.38488  | 0.0047451 | 2.3238 | [M+H] <sup>+</sup>                                      | 496.3405              | 5.22 |
| 5.06_522.36                | NA                          | 0.71245 | -0.48914 | 0.0051345 | 2.2895 | [M+H] <sup>+</sup>                                      | 522.3557              | 5.06 |
| 1.08_558.47                | NA                          | 0.54813 | -0.86742 | 0.0053599 | 2.2708 | [M+NH <sub>4</sub> ] <sup>+</sup>                       | 558.4708              | 1.08 |
| 0.99_593.60                | NA                          | 0.58237 | -0.77999 | 0.0056395 | 2.2488 | [M+H] <sup>+</sup>                                      | 593.5972              | 0.99 |
| 1.12_535.40                | NA                          | 0.54669 | -0.87121 | 0.0063809 | 2.1951 | [M+NH <sub>4</sub> ] <sup>+</sup>                       | 535.3992              | 1.12 |
| 4.49_726.54                | NA                          | 0.67688 | -0.56302 | 0.0071769 | 2.1441 | [M+H] <sup>+</sup>                                      | 726.5413              | 4.49 |
| Methionine                 | FFEARJCKVFRZR-BYPYZUCNSA-N  | 2.628   | 1.394    | 0.0076592 | 2.1158 | [M+H] <sup>+</sup> _[M+N-NH <sub>3</sub> ] <sup>+</sup> | 150.0575<br>_133.0308 | 7.16 |
| 1.09_484.40                | NA                          | 0.63975 | -0.64443 | 0.0077741 | 2.1093 | [M+NH <sub>4</sub> ] <sup>+</sup>                       | 484.3964              | 1.09 |
| 1.09_467.37                | NA                          | 0.597   | -0.74419 | 0.0089033 | 2.0504 | [M+H] <sup>+</sup>                                      | 467.3722              | 1.09 |
| CAR(12:0)                  | FUJLYHJROOYKRA-QGZVFWFLSA-N | 0.45264 | -1.1435  | 0.0091634 | 2.0379 | [M+H] <sup>+</sup>                                      | 344.2791              | 3.69 |
| PC(O-16:0/22:6)            | QQQQNYAHSSIZBU-HIQXTUQZSA-N | 0.47007 | -1.089   | 0.0096539 | 2.0153 | [M+H] <sup>+</sup>                                      | 792.5906              | 3.85 |
| 4.99_508.38                | NA                          | 0.75516 | -0.40514 | 0.0096539 | 2.0153 | [M+H] <sup>+</sup>                                      | 508.375               | 4.99 |
| Glycocholic acid           | RFDAIACWWDREDC-FRVQLJSFSA-N | 3.3463  | 1.7425   | 0.0096539 | 2.0153 | [M+H] <sup>+</sup> _[M+NH <sub>4</sub> ] <sup>+</sup>   | 483.342<br>_466.3154  | 5.89 |
| 3.95_752.56                | NA                          | 0.43798 | -1.1911  | 0.0097492 | 2.011  | [M+H] <sup>+</sup>                                      | 752.5594              | 3.95 |
| PC(16:0/14:0)              | UIXXHROAQSBBOV-PSXMRANNSA-N | 1.4733  | 0.55908  | 0.0099315 | 2.003  | [M+H] <sup>+</sup>                                      | 706.5375              | 4.46 |
| 1.07_590.48                | NA                          | 0.36984 | -1.435   | 0.009957  | 2.0019 | [M+H] <sup>+</sup>                                      | 590.4756              | 1.07 |
| 5.51_876.56                | NA                          | 1.3788  | 0.46342  | 0.010174  | 1.9925 | [M+H] <sup>+</sup>                                      | 876.5611              | 5.51 |
| 3.86_834.60                | NA                          | 0.53889 | -0.89193 | 0.01042   | 1.9821 | [M+H] <sup>+</sup>                                      | 834.6032              | 3.86 |
| 5.51_859.53                | NA                          | 1.3488  | 0.43169  | 0.01042   | 1.9821 | [M+H] <sup>+</sup>                                      | 859.5334              | 5.51 |
| Hippuric acid              | QIAFMBKCNZACKA-UHFFFAOYSA-N | 0.4888  | -1.0327  | 0.011142  | 1.953  | [M+H] <sup>+</sup>                                      | 180.0645              | 3.38 |
| Carnitine                  | PHIQHXFUZVPYII-ZCFIWIWBSA-N | 1.3187  | 0.39913  | 0.011368  | 1.9443 | [M+H] <sup>+</sup> _[M+Na] <sup>+</sup>                 | 162.1127<br>_184.0937 | 7.48 |
| 1.12_530.44                | NA                          | 0.54093 | -0.8865  | 0.011789  | 1.9285 | [M+H] <sup>+</sup>                                      | 530.4398              | 1.12 |
| 0.90_855.74                | NA                          | 1.4127  | 0.49848  | 0.011789  | 1.9285 | [M+H] <sup>+</sup>                                      | 855.7403              | 0.90 |
| 4.34_706.54                | NA                          | 1.5463  | 0.62878  | 0.011789  | 1.9285 | [M+H] <sup>+</sup>                                      | 706.5372              | 4.34 |
| 4.09_806.57                | NA                          | 0.46259 | -1.1122  | 0.012115  | 1.9167 | [M+H] <sup>+</sup>                                      | 806.5707              | 4.09 |
| 4.59_450.32                | NA                          | 5.1065  | 2.3523   | 0.012196  | 1.9138 | [M+H] <sup>+</sup>                                      | 450.3201              | 4.59 |
| 5-Aminovaleric acid        | JJMDCOVWQJGCB-UHFFFAOYSA-N  | 2.4665  | 1.3025   | 0.012615  | 1.8991 | [M+H-H <sub>2</sub> O] <sup>+</sup>                     | 100.0752              | 1.50 |

|                                                |                             |         |          |          |        |                                          |                       |      |
|------------------------------------------------|-----------------------------|---------|----------|----------|--------|------------------------------------------|-----------------------|------|
| Betaine                                        | NA                          | 1.3747  | 0.45909  | 0.012706 | 1.896  | [M+H] <sup>+</sup>                       | 118.0863              | 6.98 |
| 1.00_561.53                                    | NA                          | 0.79599 | -0.32917 | 0.013599 | 1.8665 | [M+H] <sup>+</sup>                       | 561.535               | 1.00 |
| 1.19_495.33                                    | NA                          | 0.7114  | -0.49127 | 0.01454  | 1.8374 | [M+K] <sup>+</sup>                       | 495.3284              | 1.19 |
| 1.14_498.38                                    | NA                          | 0.57136 | -0.80754 | 0.015377 | 1.8131 | [M+NH <sub>4</sub> ] <sup>+</sup>        | 498.3779              | 1.14 |
| 4.58_467.35                                    | NA                          | 4.6179  | 2.2072   | 0.015862 | 1.7996 | [M+NH <sub>4</sub> ] <sup>+</sup>        | 467.3469              | 4.58 |
| SM(d18:1/12:0)                                 | HZCLJRFPMKWHR-FEBLJDHQSA-N  | 0.74823 | -0.41844 | 0.01686  | 1.7732 | [M+H] <sup>+</sup>                       | 647.5109              | 4.99 |
| 7- $\alpha$ -OH-3-oxo-Cholest-4-en-26-oic acid | SATGKQGFUDXGAX-SLTBQWEQSA-N | 1.5544  | 0.63632  | 0.016956 | 1.7707 | [M+H] <sup>+</sup>                       | 431.3148              | 1.21 |
| 1.01_533.50                                    | NA                          | 2.2536  | 1.1722   | 0.017936 | 1.7463 | [M+H] <sup>+</sup>                       | 533.5018              | 1.01 |
| Glycoursodeoxycholic acid                      | GHCZAUBVMUEKKP-TVQURETASA-N | 3.4105  | 1.77     | 0.017936 | 1.7463 | [M+H-H <sub>2</sub> O] <sup>+</sup>      | 432.3095              | 4.71 |
| 4.12_808.58                                    | NA                          | 0.59533 | -0.74825 | 0.019255 | 1.7155 | [M+NH <sub>4</sub> ] <sup>+</sup>        | 808.5849              | 4.12 |
| 4.71_467.35                                    | NA                          | 4.6032  | 2.2026   | 0.019665 | 1.7063 | [M+NH <sub>4</sub> ] <sup>+</sup>        | 467.3469              | 4.71 |
| 3.59_806.56                                    | NA                          | 9.5029  | 3.2484   | 0.021804 | 1.6615 | [M+H] <sup>+</sup>                       | 806.5649              | 3.59 |
| 1.10_610.50                                    | NA                          | 0.6264  | -0.67485 | 0.021848 | 1.6606 | [M+NH <sub>4</sub> ] <sup>+</sup>        | 610.5033              | 1.10 |
| 1.09_611.50                                    | NA                          | 0.62514 | -0.67776 | 0.023239 | 1.6338 | [M+H] <sup>+</sup>                       | 611.5043              | 1.09 |
| 3.68_752.56                                    | NA                          | 1.4323  | 0.51834  | 0.024429 | 1.6121 | [M+H] <sup>+</sup>                       | 752.5611              | 3.68 |
| 5.26_459.25                                    | NA                          | 1.2641  | 0.33816  | 0.024866 | 1.6044 | [M+Na] <sup>+</sup>                      | 459.2493              | 5.26 |
| 1.11_465.36                                    | NA                          | 0.56038 | -0.83553 | 0.025615 | 1.5915 | [M+K] <sup>+</sup>                       | 465.3566              | 1.11 |
| 5.53_880.59                                    | NA                          | 1.3875  | 0.47249  | 0.025615 | 1.5915 | [M+H] <sup>+</sup>                       | 880.5926              | 5.53 |
| 4.33_704.52                                    | NA                          | 1.4312  | 0.51723  | 0.026407 | 1.5783 | [M-H] <sup>-</sup>                       | 704.5217              | 4.33 |
| PC(P-18:0/22:6)                                | TXHZYNSTTCIWMJ-RXSQUPBGSA-N | 1.5795  | 0.65944  | 0.030166 | 1.5205 | [M+H] <sup>+</sup>                       | 818.605               | 4.28 |
| PC(18:0/22:6)                                  | FAUYAENFVCNTAL-PFFNLMTBSA-N | 1.4693  | 0.55516  | 0.033211 | 1.4787 | [M+H] <sup>+</sup>                       | 834.601               | 4.31 |
| CAR(16:0)                                      | XOMRRQXKHYMOC-OAQYLSRUSA-N  | 0.58488 | -0.77378 | 0.035685 | 1.4475 | [M+H] <sup>+</sup>                       | 400.3417              | 3.14 |
| 5.53_863.56                                    | NA                          | 1.3499  | 0.43288  | 0.037328 | 1.428  | [M+H] <sup>+</sup>                       | 863.5644              | 5.53 |
| 4.71_450.32                                    | NA                          | 3.6375  | 1.863    | 0.037577 | 1.4251 | [M+H] <sup>+</sup>                       | 450.3206              | 4.71 |
| 1.09_595.49                                    | NA                          | 0.58852 | -0.76483 | 0.039665 | 1.4016 | [M+H] <sup>+</sup>                       | 595.494               | 1.09 |
| 1.13_463.34                                    | NA                          | 0.66275 | -0.59347 | 0.040435 | 1.3932 | [M+NH <sub>4</sub> ] <sup>+</sup>        | 463.3411              | 1.13 |
| LysoPC(P-16:0)                                 | HTZINLFNXLXRBC-CQLBIITFSA-N | 0.77154 | -0.37418 | 0.040435 | 1.3932 | [M+H] <sup>+</sup>                       | 480.3446              | 5.05 |
| 5.26_476.28                                    | NA                          | 1.2362  | 0.30592  | 0.040435 | 1.3932 | [M+NH <sub>4</sub> ] <sup>+</sup>        | 476.2762              | 5.26 |
| Leucine                                        | ROHFNLRQFUQHCH-YFKPBYRVSA-N | 1.2424  | 0.31312  | 0.040965 | 1.3876 | [M+H] <sup>+</sup>                       | 132.1013              | 6.76 |
| SM(d18:1/18:0)                                 | LKQLRGMMMAHREN-YJFYUILSA-N  | 3.6618  | 1.8725   | 0.042682 | 1.3698 | [M+H] <sup>+</sup> + [M+Na] <sup>+</sup> | 731.6044<br>_753.5881 | 4.92 |
| 3.89_752.56                                    | NA                          | 0.49714 | -1.0083  | 0.044681 | 1.3499 | [M+H] <sup>+</sup>                       | 752.561               | 3.89 |
| 1.08_469.39                                    | NA                          | 0.67654 | -0.56375 | 0.044817 | 1.3486 | [M-H+2Li] <sup>+</sup>                   | 469.3884              | 1.08 |
| 4.30_792.59                                    | NA                          | 1.3796  | 0.46428  | 0.044817 | 1.3486 | [M+H] <sup>+</sup>                       | 792.59                | 4.30 |
| PC(O-16:0/20:4)                                | NA                          | 1.2813  | 0.35766  | 0.048851 | 1.3111 | [M+H] <sup>+</sup>                       | 768.5897              | 4.33 |
| CAR(10:0)                                      | NA                          | 0.63626 | -0.65231 | 0.051466 | 1.2885 | [M+H] <sup>+</sup>                       | 316.2478              | 4.11 |
| 0.91_565.40                                    | NA                          | 0.74674 | -0.42133 | 0.051466 | 1.2885 | [M+H] <sup>+</sup>                       | 565.4021              | 0.91 |
| Trigonelline                                   | WWNNZCOKKKDOPX-UHFFFAOYSA-N | 0.44383 | -1.1719  | 0.054675 | 1.2622 | [M+H] <sup>+</sup>                       | 138.0544              | 7.20 |
| 3-Methylhistidine                              | JDHILDINMRGULE-LURJTMIESA-N | 1.7494  | 0.80683  | 0.055983 | 1.2519 | [M+H] <sup>+</sup>                       | 170.0917              | 9.10 |

|                           |                             |         |          |          |        |                                   |          |      |
|---------------------------|-----------------------------|---------|----------|----------|--------|-----------------------------------|----------|------|
| 1.06_596.50               | NA                          | 0.6278  | -0.67162 | 0.057462 | 1.2406 | [M+NH <sub>4</sub> ] <sup>+</sup> | 596.5042 | 1.06 |
| Palmitoleoyl ethanolamide | WFRLANWAASSSFV-FPLPWBNSA-N  | 1.3027  | 0.38155  | 0.057462 | 1.2406 | [M+H] <sup>+</sup>                | 298.274  | 1.02 |
| 1.09_593.48               | NA                          | 0.69228 | -0.53056 | 0.065682 | 1.1826 | [M+H] <sup>+</sup>                | 593.478  | 1.09 |
| 4.00_794.61               | NA                          | 0.51541 | -0.9562  | 0.066688 | 1.176  | [M+H] <sup>+</sup>                | 794.6068 | 4.00 |
| 5.27_526.26               | NA                          | 0.38374 | -1.3818  | 0.069315 | 1.1592 | [M+H] <sup>+</sup>                | 526.2637 | 5.27 |
| 4.35_780.55               | NA                          | 0.80565 | -0.31177 | 0.070296 | 1.1531 | [M+K] <sup>+</sup>                | 780.5539 | 4.35 |
| Acetylcarnitine           | RDHQFKQIGNGIED-MRVPVSSYSA-O | 1.3167  | 0.39688  | 0.074738 | 1.1265 | [M+H] <sup>+</sup>                | 204.1234 | 6.95 |
| 1.08_597.51               | NA                          | 0.7075  | -0.49919 | 0.076609 | 1.1157 | [M+H] <sup>+</sup>                | 597.5082 | 1.08 |
| 5.20_468.31               | NA                          | 0.71194 | -0.49016 | 0.081911 | 1.0867 | [M+H] <sup>+</sup>                | 468.3072 | 5.20 |
| 1.09_612.52               | NA                          | 0.68312 | -0.54979 | 0.089909 | 1.0462 | [M+NH <sub>4</sub> ] <sup>+</sup> | 612.5181 | 1.09 |

**Table S2:** Significant annotated metabolites comparing WD to HC. Metabolites were selected by volcano plot with fold change (FC) >1.2 and FDR-adjusted  $p < 0.1$  indicating significance.

| Metabolite Name/Identifier                     | InChI Key                    | FC      | log2 (FC) | FDR $p$ -value | -log10 (p) | Species                                                        | m/z                  | RT   |
|------------------------------------------------|------------------------------|---------|-----------|----------------|------------|----------------------------------------------------------------|----------------------|------|
| Choline                                        | OEYIOHPDSNJKLS-UHFFFAOYSA-N  | 4.0012  | 2.0004    | 1.39E-16       | 15.857     | [M+H] <sup>+</sup>                                             | 104.1066             | 5.12 |
| Phenylalanine                                  | COLNVLDHVKWLR-TQMMGPOBSA-N   | 2.2828  | 1.1908    | 8.69E-11       | 10.061     | [M+H] <sup>+</sup>                                             | 166.0862             | 6.61 |
| 2-Hydroxyphenethylamine                        | ULSIYEDSMZIPX-UHFFFAOYSA-N   | 2.2469  | 1.1679    | 1.27E-10       | 9.895      | [M+H-H <sub>2</sub> O] <sup>+</sup>                            | 120.0804             | 6.61 |
| PS(18:0/20:4)                                  | SVOUGFEDROZBJI-DNALCEECSA-N  | 0.37007 | -1.4341   | 1.75E-09       | 8.7569     | [M+H] <sup>+</sup>                                             | 812.5433             | 5.4  |
| S1P                                            | DUYSYHSSBDVJSM-KRWOKUGFSA-N  | 0.63312 | -0.65946  | 9.11E-09       | 8.0405     | [M+H] <sup>+</sup>                                             | 380.2552             | 5.96 |
| LysoPC(24:0)                                   | SKJMUADLQLZAGH-WJOKGBTCSA-N  | 0.69909 | -0.51645  | 0.00000118     | 5.9283     | [M+H] <sup>+</sup>                                             | 608.4634             | 5.03 |
| LysoPC(P-18:0)                                 | WBOMIOWRFSPZMC-AYICAFKVSA-N  | 0.53166 | -0.91143  | 0.00000211     | 5.6766     | [M+H] <sup>+</sup>                                             | 508.3748             | 5.22 |
| LysoPC(14:0)                                   | VXUOFDJKYGDUII-OAQYLSRUSA-N  | 0.54089 | -0.88658  | 0.0000405      | 4.3922     | [M+H] <sup>+</sup>                                             | 468.3086             | 5.29 |
| Methionine                                     | FFEARJCKVFRZRR-BYPYZUCNSA-N  | 2.4829  | 1.312     | 0.0000824      | 4.084      | [M+H] <sup>+</sup> <sub>[M+N-NH<sub>3</sub>]<sup>+</sup></sub> | 150.0575<br>_133.030 | 7.16 |
| PC(18:3/18:3)                                  | XXXKFTJOZELMD-JICBSJGISA-N   | 0.55151 | -0.85853  | 0.0001062      | 3.9738     | [M+H] <sup>+</sup>                                             | 778.5374             | 4.18 |
| Hippuric acid                                  | QIAFMBKCNZACKA-UHFFFAOYSA-N  | 0.46299 | -1.111    | 0.0001276      | 3.8941     | [M+H] <sup>+</sup>                                             | 180.0645             | 3.38 |
| PC(18:1/14:0)                                  | KIVAJCJTVPWSRJ-OQHNRNOKSA-N  | 1.7027  | 0.76784   | 0.0004403      | 3.3562     | [M+H] <sup>+</sup>                                             | 732.5534             | 4.43 |
| SM(d18:1/18:1)                                 | NBEADXXAAWCCDG-QDDWGVBSA-N   | 0.79652 | -0.32822  | 0.000517       | 3.2866     | [M+H] <sup>+</sup>                                             | 729.5913             | 4.93 |
| LysoPC(18:1)                                   | YAMUFBWLWGFICM-PTGWMXDISA-N  | 0.74449 | -0.42567  | 0.0007722      | 3.1123     | [M+H] <sup>+</sup>                                             | 522.3559             | 5.17 |
| Kynurenine                                     | YGPSJZOEDVAXAB-QMMMGPOBSA-N  | 1.4163  | 0.50211   | 0.0012296      | 2.9103     | [M+H] <sup>+</sup>                                             | 209.0914             | 6.62 |
| Tyrosine                                       | OUYCCCASQSFEME-QMMMGPOBSA-N  | 1.6318  | 0.70646   | 0.001598       | 2.7964     | [M+H] <sup>+</sup>                                             | 182.0802             | 7.39 |
| PC(14:0/18:0)                                  | TYAQXZHDAGZOEK-KXQOOQHDSA-N  | 1.9597  | 0.97061   | 0.0016193      | 2.7907     | [M+H] <sup>+</sup>                                             | 734.5685             | 4.45 |
| Betaine                                        | KWIUHFFTVRNATP-UHFFFAOYSA-N  | 1.2811  | 0.35743   | 0.001999       | 2.6992     | [M+H] <sup>+</sup>                                             | 118.0863             | 6.98 |
| SM(d18:1/12:0)                                 | HZCLJRFPXMKWHR-FEBLJDHQSA-N  | 0.70579 | -0.5027   | 0.0020034      | 2.6982     | [M+H] <sup>+</sup>                                             | 647.5109             | 4.99 |
| Histidine                                      | HNDVDQJIGZPNO-YFKPBYRVSA-N   | 1.6583  | 0.72974   | 0.0035973      | 2.444      | [M+H] <sup>+</sup>                                             | 156.0762             | 9.07 |
| PC(O-16:0/22:6)                                | QQQQNYAHSSIZBU-HIQTUQZSA-N   | 0.45367 | -1.1403   | 0.0041881      | 2.378      | [M+H] <sup>+</sup>                                             | 792.5906             | 3.85 |
| PC(P-18:0/20:4)                                | FHHVIBPVBBRLOR-IYACIECVSA-N  | 1.4915  | 0.57678   | 0.0056143      | 2.2507     | [M+H] <sup>+</sup>                                             | 794.6058             | 4.3  |
| 7- $\alpha$ -OH-3-oxo-Cholest-4-en-26-oic acid | SATGKQGFUDXGAX-SLTBQWEQSA-N  | 1.4507  | 0.53671   | 0.0062521      | 2.204      | [M+H] <sup>+</sup>                                             | 431.3148             | 1.21 |
| PC(16:1/16:1)                                  | GPWHCUUIQMGE LX-VHQDNGOZSA-N | 0.69923 | -0.51616  | 0.0075823      | 2.1202     | [M+H] <sup>+</sup>                                             | 730.5372             | 4.43 |
| CAR(12:0)                                      | FUJLYHJROOYKRA-QGZVFWFLSA-N  | 0.42552 | -1.2327   | 0.0078147      | 2.1071     | [M+H] <sup>+</sup>                                             | 344.2791             | 3.69 |
| Ornithine                                      | AHLPHDHHMVZTML-BYPYZUCNSA-N  | 2.179   | 1.1237    | 0.012353       | 1.9082     | [M+H] <sup>+</sup>                                             | 133.0961             | 9.27 |
| 4-Aminomethylcyclo hexane carboxylic acid      | GYPDJEQRTZSCIOI-LJGSYFOKSA-N | 0.76913 | -0.3787   | 0.015054       | 1.8223     | [M-H] <sup>-</sup>                                             | 158.1166             | 6.62 |
| PHE-PHE                                        | GKZIWHNRKRBEOH-UHFFFAOYSA-N  | 0.64583 | -0.63078  | 0.015136       | 1.82       | [M+H] <sup>+</sup>                                             | 313.1546             | 5.57 |
| LysoPC(15:0)                                   | RJZVWDTYEWCUAR-JOCHJYFZSA-N  | 0.28009 | -1.8361   | 0.015555       | 1.8081     | [M+H] <sup>+</sup> <sub>[M+Na]<sup>+</sup></sub>               | 482.3215<br>_504.307 | 5.27 |
| Proline                                        | ONIBWKKTOPOVIA-BYPYZUCNSA-N  | 1.3805  | 0.46521   | 0.015555       | 1.8081     | [M+H] <sup>+</sup>                                             | 116.0696             | 7.44 |
| N-Methylproline                                | CWLQUGTUXBXTLF-YFKPBYRVSA-N  | 1.7086  | 0.77284   | 0.020158       | 1.6956     | [M+H] <sup>+</sup>                                             | 130.0856             | 6.87 |
| PC(P-18:0/22:6)                                | TXHZYNSTTCIWMJ-RXSQUPBGSA-N  | 1.4507  | 0.53671   | 0.020538       | 1.6874     | [M+H] <sup>+</sup>                                             | 818.605              | 4.28 |
| Alanine                                        | QNAYBMKLOCPYGR-REOHLBBSA-N   | 1.3144  | 0.39441   | 0.020763       | 1.6827     | [M+H] <sup>+</sup>                                             | 90.0542              | 7.79 |
| LysoPC(16:0).2                                 | ASWBNKHCZGQVJV-HSZRFAPSA-N   | 1.2194  | 0.28614   | 0.020763       | 1.6827     | [M+H] <sup>+</sup>                                             | 518.3223             | 5.24 |



|                           |                             |         |          |          |        |                                                       |                      |      |
|---------------------------|-----------------------------|---------|----------|----------|--------|-------------------------------------------------------|----------------------|------|
| SM(d18:1/18:0)            | LKQLRGMMAHREN-YJFYUISA-N    | 3.3044  | 1.7244   | 0.020763 | 1.6827 | [M+H] <sup>+</sup> _[M+Na] <sup>+</sup>               | 731.6044<br>_753.588 | 4.92 |
| PC(16:0/14:0)             | UIXXHROAQSBBOV-PSXMRANNSA-N | 1.372   | 0.45623  | 0.020763 | 1.6827 | [M+H] <sup>+</sup>                                    | 706.5375             | 4.46 |
| PC(18:0/22:6)             | FAUYAENFVCNTAL-PFFNLMTBSA-N | 1.3482  | 0.43104  | 0.021426 | 1.6691 | [M+H] <sup>+</sup>                                    | 834.601              | 4.31 |
| LysoPC(P-16:0)            | HTZINLFNXLXRBC-CQLBIITFSA-N | 0.72122 | -0.4715  | 0.025922 | 1.5863 | [M+H] <sup>+</sup>                                    | 480.3446             | 5.05 |
| CAR(16:0)                 | XOMRRQXKHYMOC-OAQYLSRUSA-N  | 0.55595 | -0.84697 | 0.025922 | 1.5863 | [M+H] <sup>+</sup>                                    | 400.3417             | 3.14 |
| 5-Aminopentanoic acid     | JJMDCOVWQJGCB-UHFFFAOYSA-N  | 2.2459  | 1.1673   | 0.025922 | 1.5863 | [M+H-H <sub>2</sub> O] <sup>+</sup>                   | 100.0752             | 1.5  |
| Glycocholic acid          | RFDAIACWWDREDC-FRVQLJSFSA-N | 3.2332  | 1.6929   | 0.027337 | 1.5633 | [M+H] <sup>+</sup> _[M+NH <sub>4</sub> ] <sup>+</sup> | 483.342<br>_466.315  | 5.89 |
| Glycoursodeoxycholic acid | GHCZAUBVMUEKKP-TVQURETASA-N | 3.3015  | 1.7231   | 0.027337 | 1.5633 | [M+H-H <sub>2</sub> O] <sup>+</sup>                   | 432.3095             | 4.71 |
| Trigonelline              | WWNNZCOKKKDOPX-UHFFFAOYSA-N | 0.43348 | -1.206   | 0.027337 | 1.5633 | [M+H] <sup>+</sup>                                    | 138.0544             | 7.2  |
| CAR(10:0)                 | LZOSYCMHQXPBFU-OAHLLOKOSA-N | 0.59019 | -0.76075 | 0.027337 | 1.5633 | [M+H] <sup>+</sup>                                    | 316.2478             | 4.11 |
| 3-Methylhistidine         | JDHILDINMRGULE-LURJTMIESA-N | 1.6305  | 0.7053   | 0.048372 | 1.3154 | [M+H] <sup>+</sup>                                    | 170.0917             | 9.1  |
| LysoPE(18:1)              | PYVRVRFVLRNJLY-MZMPXXGTSA-N | 0.83298 | -0.26365 | 0.048552 | 1.3138 | [M+H] <sup>+</sup>                                    | 480.308              | 5.44 |
| Carnitine                 | PHIQHXFUZVPYIL-ZCFIWIBFSA-N | 1.2213  | 0.28843  | 0.053572 | 1.2711 | [M+H] <sup>+</sup> _[M+Na] <sup>+</sup>               | 162.1127<br>_184.093 | 7.48 |
| Palmitoleoyl Ethanolamide | WFRLANWAASSFV-FPLPWBNSA-N   | 1.2205  | 0.28748  | 0.082333 | 1.0844 | [M+H] <sup>+</sup>                                    | 298.274              | 1.02 |

**Table S3:** Significant annotated metabolites comparing WD pre-clinical to HC. Metabolites were selected by volcano plot with fold change (FC) >1.2 and FDR-adjusted  $p < 0.1$  indicating significance.

| Metabolite Name/Identifier | InChI Key                    | FC      | log2 (FC) | FDR $p$ -value | -log10 (p) | Species                                                 | m/z                  | RT   |
|----------------------------|------------------------------|---------|-----------|----------------|------------|---------------------------------------------------------|----------------------|------|
| Phenylalanine              | COLNVLDHVKWLRT-QMMMGPBSA-N   | 2.1545  | 1.1073    | 1.35E-08       | 7.8688     | [M+H] <sup>+</sup>                                      | 166.0862             | 6.61 |
| 2-Hydroxy phenethylamine   | ULSIYEODSMZIPX-UHFFFAOYSA-N  | 2.1174  | 1.0823    | 1.35E-08       | 7.8688     | [M+H-H <sub>2</sub> O] <sup>+</sup>                     | 120.0804             | 6.61 |
| Choline                    | OEYIOHPDSNJKLS-UHFFFAOYSA-N  | 3.3713  | 1.7533    | 0.00012916     | 3.8889     | [M+H] <sup>+</sup>                                      | 104.1066             | 5.12 |
| LysoPC(14:0)               | VXUOFDJKYGDUJI-OAQYLSRUSA-N  | 0.48547 | -1.0425   | 0.0005243      | 3.2804     | [M+H] <sup>+</sup>                                      | 468.3086             | 5.29 |
| LysoPC(18:1)               | YAMUFBLWGFICMPTGWMXDISA-N    | 0.72554 | -0.46288  | 0.0026638      | 2.5745     | [M+H] <sup>+</sup>                                      | 522.3559             | 5.17 |
| LysoPC(24:0)               | SKJMUADLQLZAGH-WJOKGBTCSA-N  | 0.63566 | -0.65366  | 0.0038754      | 2.4117     | [M+H] <sup>+</sup>                                      | 608.4634             | 5.03 |
| S1P                        | DUYSYHSSBDVJSM-KRWOKUGFSA-N  | 0.66126 | -0.59671  | 0.0058796      | 2.2306     | [M+H] <sup>+</sup>                                      | 380.2552             | 5.96 |
| LysoPC(P-18:0)             | WBOMIOWRFSPZMC-AYICAFKVSA-N  | 0.61776 | -0.69488  | 0.0072996      | 2.1367     | [M+H] <sup>+</sup>                                      | 482.3235             | 5.42 |
| SM(d18:1/12:0)             | HZCLJRFPMKWHR-FEBLJDHQSA-N   | 0.61614 | -0.69868  | 0.0084358      | 2.0739     | [M+H] <sup>+</sup>                                      | 647.5109             | 4.99 |
| PC(16:1/16:1)              | GPWHCUUIQMGEIX-VHQDNGOZSA-N  | 0.66569 | -0.58708  | 0.01034        | 1.9855     | [M+H] <sup>+</sup>                                      | 730.5372             | 4.43 |
| PC(18:1/14:0)              | KIVAJCJTVPWSRJ-OQHNRNOKSA-N  | 1.5029  | 0.58776   | 0.013734       | 1.8622     | [M+H] <sup>+</sup>                                      | 732.5534             | 4.43 |
| PC(18:3/18:3)              | XXXKFQJJOJZELMD-JICBSJGISA-N | 0.61953 | -0.69075  | 0.013734       | 1.8622     | [M+H] <sup>+</sup>                                      | 778.5374             | 4.18 |
| LysoPC(P-16:0)             | HTZINLFNXLXRBC-CQLBIITFSA-N  | 0.5871  | -0.76832  | 0.013734       | 1.8622     | [M+H] <sup>+</sup>                                      | 508.3748             | 5.22 |
| PS(18:0/20:4)              | SVOUGFFDROZBJI-DNALCEECSA-N  | 0.37882 | -1.4004   | 0.013734       | 1.8622     | [M+H] <sup>+</sup>                                      | 812.5433             | 5.4  |
| Hippuric acid              | QIAFMBKCNZACKA-UHFFFAOYSA-N  | 0.26282 | -1.9279   | 0.013734       | 1.8622     | [M+H] <sup>+</sup>                                      | 180.0645             | 3.38 |
| PC(14:0/18:0)              | TYAQXZHDAGZOEOKXQOOQHDSA-N   | 1.6287  | 0.70372   | 0.017233       | 1.7636     | [M+H] <sup>+</sup>                                      | 678.5046             | 4.49 |
| PC(O-16:0/22:6)            | QQQQNYAHSSIZBU-HIQXTUQZSA-N  | 0.32436 | -1.6244   | 0.017504       | 1.7569     | [M+H] <sup>+</sup>                                      | 792.5906             | 3.85 |
| 3-Methylhistidine          | JDHILDINMRGULE-LURJTMIESA-N  | 1.7099  | 0.77394   | 0.01771        | 1.7518     | [M+H] <sup>+</sup>                                      | 170.0917             | 9.1  |
| SM(d18:1/18:0)             | LKQLRGMMMAHRENYJFYUILSA-N    | 4.6239  | 2.2091    | 0.026926       | 1.5698     | [M+H] <sup>+</sup> _[M+Na] <sup>+</sup>                 | 731.6044<br>_753.588 | 4.92 |
| Ornithine                  | AHLPHDHMMVZTML-BYPYZUCNSA-N  | 1.8425  | 0.88165   | 0.031326       | 1.5041     | [M+H] <sup>+</sup>                                      | 133.0961             | 9.27 |
| SM(d18:1/24:1)             | UYDFMJRVHYJLQZ-KVICREPESA-N  | 2.9102  | 1.5411    | 0.032995       | 1.4816     | [M+H] <sup>+</sup>                                      | 813.6819             | 4.89 |
| PHE-PHE                    | GKZIWHNRNKRBEOH-UHFFFAOYSA-N | 0.46692 | -1.0988   | 0.032995       | 1.4816     | [M+H] <sup>+</sup>                                      | 313.1546             | 5.57 |
| CAR(16:0)                  | XOMRRQXKHYMOC-OAQYLSRUSA-N   | 0.39103 | -1.3546   | 0.032995       | 1.4816     | [M+H] <sup>+</sup>                                      | 400.3417             | 3.14 |
| LysoPC(15:0)               | RJZVWDTYEWCUAR-JOCHJYFZSA-N  | 0.29578 | -1.7574   | 0.032995       | 1.4816     | [M+H] <sup>+</sup> _[M+Na] <sup>+</sup>                 | 482.3215<br>_504.307 | 5.27 |
| Trigonelline               | WWNNZCOKKKDOPX-UHFFFAOYSA-N  | 0.27292 | -1.8734   | 0.032995       | 1.4816     | [M+H] <sup>+</sup>                                      | 138.0544             | 7.2  |
| Alanine                    | QNAYBMKLOCPYGI-REOHCLBHSAN   | 1.3097  | 0.38919   | 0.034779       | 1.4587     | [M+H] <sup>+</sup>                                      | 90.0542              | 7.79 |
| Kynurenine                 | YGPSJZOEDVAXAB-QMMMGPBSA-N   | 1.2392  | 0.30943   | 0.043007       | 1.3665     | [M+H] <sup>+</sup>                                      | 209.0914             | 6.62 |
| Histidine                  | HNDVDQJIGZPNO-YFKPBYRVSA-N   | 1.3423  | 0.42472   | 0.045202       | 1.3448     | [M+H] <sup>+</sup>                                      | 156.0762             | 9.07 |
| Proline                    | ONIBWKKTOPOVIA-BYPYZUCNSA-N  | 1.3413  | 0.42368   | 0.047436       | 1.3239     | [M+H] <sup>+</sup>                                      | 116.0696             | 7.44 |
| Lyso(PE18:1)               | PYVRVRFVLRNJLY-MZMPXXGTSA-N  | 0.71988 | -0.47418  | 0.047436       | 1.3239     | [M+H] <sup>+</sup>                                      | 480.308              | 5.44 |
| Methionine                 | FFEARJCKVFRZRR-BYPYZUCNSA-N  | 1.3041  | 0.38304   | 0.053444       | 1.2721     | [M+H] <sup>+</sup> _[M+N-NH <sub>3</sub> ] <sup>+</sup> | 150.0575<br>_133.030 | 7.16 |
| Gal ceramide (d18:1/24:1)  | WBOZIXHPUPAOIA-YEWIENRVSA-N  | 1.628   | 0.70311   | 0.060268       | 1.2199     | [M+H] <sup>+</sup>                                      | 810.6806             | 1.46 |
| PC(O-18:1/2:0)             | NA                           | 0.73524 | -0.44372  | 0.060268       | 1.2199     | [M+H] <sup>+</sup>                                      | 550.3851             | 5.01 |
| LysoPC(18:0)               | ATHVAWFAEPLPPQ-QPOMNCEOSA-N  | 0.70519 | -0.50393  | 0.060268       | 1.2199     | [M+H] <sup>+</sup>                                      | 506.3592             | 5.02 |

|                 |                                 |        |         |          |        |                                         |                      |      |
|-----------------|---------------------------------|--------|---------|----------|--------|-----------------------------------------|----------------------|------|
| N6-Methyllysine | PQNASZJZHFPQLE-<br>UHFFFAOYSA-N | 1.3341 | 0.41584 | 0.077546 | 1.1104 | [M+H] <sup>+</sup>                      | 161.1275             | 8.99 |
| Carnitine       | PHIQHXFUZVPYII-<br>ZCFIWIBFSA-N | 1.2445 | 0.31559 | 0.0819   | 1.0867 | [M+H] <sup>+</sup> _[M+Na] <sup>+</sup> | 162.1127<br>_184.093 | 7.48 |
| PC(P-18:0/20:4) | FHHVIBPVBBRLOR-<br>IYACIECVSA-N | 1.3596 | 0.44317 | 0.082391 | 1.0841 | [M+H] <sup>+</sup>                      | 794.6058             | 4.3  |

**Table S4:** Significant annotated metabolites comparing WD neurologic to HC. Metabolites were selected by volcano plot with fold change (FC) >1.2 and FDR-adjusted  $p < 0.1$  indicating significance.

| Metabolite Name/Identifier                     | InChI Key                   | FC      | log2 (FC) | FDR $p$ -value | $-\log_{10}$ (p) | Species                                                  | m/z                  | RT   |
|------------------------------------------------|-----------------------------|---------|-----------|----------------|------------------|----------------------------------------------------------|----------------------|------|
| Choline                                        | OEYIOHPDSNJKLS-UHFFFAOYSA-N | 3.9237  | 1.9722    | 2.15E-13       | 12.668           | [M+H] <sup>+</sup>                                       | 104.107              | 5.12 |
| Phenylalanine                                  | COLNVLDHVKWLRT-QMMMGPBSA-N  | 2.1497  | 1.1041    | 6.94E-09       | 8.1585           | [M+H] <sup>+</sup>                                       | 166.086              | 6.61 |
| 2-Hydroxy phenethylamine                       | ULSIYEODSMZIPX-UHFFFAOYSA-N | 2.1188  | 1.0833    | 6.94E-09       | 8.1585           | [M+H-H <sub>2</sub> O] <sup>+</sup>                      | 120.0804             | 6.61 |
| S1P                                            | DUYSYHSSBDVJSM-KRWOKUGFSA-N | 0.60486 | -0.7253   | 1.20E-06       | 5.921            | [M+H] <sup>+</sup>                                       | 380.255              | 5.96 |
| PS(18:0/20:4)                                  | SVOUGFFDROZBJI-DNALCEECSA-N | 0.31296 | -1.6759   | 6.43E-05       | 4.1919           | [M+H] <sup>+</sup>                                       | 812.543              | 5.4  |
| LysoPC(P-18:0)                                 | WBOMIOWRFSPZMC-AYICAFKVSAN  | 0.58891 | -0.7639   | 0.0002         | 3.6889           | [M+H] <sup>+</sup>                                       | 482.324              | 5.42 |
| Methionine                                     | FFEARJCKVFRZRR-BYPYZUCNSA-N | 1.5205  | 0.60458   | 0.00056        | 3.2522           | [M+H] <sup>+</sup> + [M+N-NH <sub>3</sub> ] <sup>+</sup> | 150.0575<br>_133.030 | 7.16 |
| PC(18:1/14:0)                                  | KIVAJCJTVPWSRJ-OQHNRNOKSA-N | 1.6642  | 0.73486   | 0.00131        | 2.8839           | [M+H] <sup>+</sup>                                       | 732.553              | 4.43 |
| PC(14:0/18:0)                                  | TYAQXZHDAGZOEK-KXQOOQHDSA-N | 1.8995  | 0.9256    | 0.00215        | 2.6685           | [M+H] <sup>+</sup>                                       | 734.569              | 4.45 |
| LysoPC(24:0)                                   | SKJMUADLQLZAGH-WJOKGBTCSA-N | 0.73279 | -0.4485   | 0.00259        | 2.5873           | [M+H] <sup>+</sup>                                       | 608.463              | 5.03 |
| LysoPC(14:0)                                   | VXUOFDJKYGDUIJ-OAQYLSRUSA-N | 0.58288 | -0.7787   | 0.00259        | 2.5873           | [M+H] <sup>+</sup>                                       | 468.309              | 5.29 |
| Kynurenine                                     | YGPSJZOEDVAXAB-QMMMGPBSA-N  | 1.3776  | 0.46218   | 0.00301        | 2.5221           | [M+H] <sup>+</sup>                                       | 209.091              | 6.62 |
| Tyrosine                                       | OUYCCASQSFEME-QMMMGPBSA-N   | 1.5647  | 0.64589   | 0.00395        | 2.4036           | [M+H] <sup>+</sup>                                       | 182.08               | 7.39 |
| PC(18:3/18:3)                                  | XXKFQTJOJZELMD-JICBSJGISA-N | 0.57205 | -0.8058   | 0.00395        | 2.4036           | [M+H] <sup>+</sup>                                       | 778.537              | 4.18 |
| LysoPC(18:1)                                   | YAMUFBLWGFICM-PTGWMXDISA-N  | 0.75887 | -0.3981   | 0.00467        | 2.3308           | [M+H] <sup>+</sup>                                       | 522.356              | 5.17 |
| SM(d18:1/18:1)                                 | NBEADXWAAWCCDG-QDDWGVBSA-N  | 0.80369 | -0.3153   | 0.00561        | 2.2514           | [M+H] <sup>+</sup>                                       | 729.591              | 4.93 |
| Histidine                                      | HNDVDQJICGZPNO-YFKPBYRVSAN  | 1.5291  | 0.61269   | 0.01307        | 1.8837           | [M+H] <sup>+</sup>                                       | 156.076              | 9.07 |
| PC(P-18:0/20:4)                                | FHHVIBPVBRLORIYACIECVSAN    | 1.4379  | 0.52401   | 0.01663        | 1.7792           | [M+H] <sup>+</sup>                                       | 794.606              | 4.3  |
| PC(18:0/22:6)                                  | FAUYAENFVCNTAL-PFFNLMTBSAN  | 1.4297  | 0.51567   | 0.01887        | 1.7243           | [M+H] <sup>+</sup>                                       | 834.601              | 4.31 |
| CAR(12:0)                                      | FUJLYHJROOYKRA-QGZVFWFLSAN  | 0.35652 | -1.488    | 0.01887        | 1.7243           | [M+H] <sup>+</sup>                                       | 344.279              | 3.69 |
| LysoPC(16:0).2                                 | ASWBNKHCZGQVJV-HSZRJFAPSAN  | 1.205   | 0.26901   | 0.0191         | 1.7191           | [M+H] <sup>+</sup>                                       | 518.322              | 5.24 |
| Glycocholic acid                               | RFDAIACWWDREDC-FRVQLJSFSAN  | 2.6526  | 1.4074    | 0.01957        | 1.7085           | [M+H] <sup>+</sup> + [M+NH <sub>4</sub> ] <sup>+</sup>   | 483.342<br>_466.315  | 5.89 |
| SM(d18:1/12:0)                                 | HZCLJRFPMKWHREBBLJDHQSAN    | 0.71532 | -0.4834   | 0.01957        | 1.7085           | [M+H] <sup>+</sup>                                       | 647.511              | 4.99 |
| Ornithine                                      | AHLPHDHHMVZTML-BYPYZUCNSAN  | 1.9751  | 0.98194   | 0.02315        | 1.6355           | [M+H] <sup>+</sup>                                       | 133.096              | 9.27 |
| PC(P-18:0/22:6)                                | FAUYAENFVCNTAL-PFFNLMTBSAN  | 1.5152  | 0.5995    | 0.02869        | 1.5423           | [M+H] <sup>+</sup>                                       | 818.605              | 4.28 |
| SM(d18:1/18:0)                                 | LKQLRGMMAHRENYJFXUYLSAN     | 3.4924  | 1.8042    | 0.03491        | 1.4571           | [M+H] <sup>+</sup> + [M+Na] <sup>+</sup>                 | 731.6044<br>_753.588 | 4.92 |
| LysoPC(P-16:0)                                 | HTZINLFNXLXRBC-CQLBIITFSAN  | 0.69518 | -0.5246   | 0.0354         | 1.4511           | [M+H] <sup>+</sup>                                       | 508.375              | 5.22 |
| 1-Methylnicotinamide                           | LDHMAVIPBRSVRG-UHFFFAOYSA-O | 0.6415  | -0.6405   | 0.0354         | 1.4511           | [M+H-C <sub>4</sub> H <sub>8</sub> ] <sup>+</sup>        | 137.07               | 6.02 |
| 4-Aminomethylcyclo hexanecarboxylic acid       | GYDJEQRTZSCIOI-LJGSYFOKSA-N | 0.62293 | -0.6829   | 0.03789        | 1.4215           | [M-H] <sup>-</sup>                                       | 158.117              | 6.62 |
| 7- $\alpha$ -OH-3-oxo-Cholest-4-en-26-oic acid | SATGKQGFUDXGAX-SLTBQWEQSAN  | 1.2746  | 0.35006   | 0.03818        | 1.4182           | [M+H] <sup>+</sup>                                       | 431.315              | 1.21 |
| PC(16:1/16:1)                                  | GPWHCUUIQMGLXVHQDNGOZSAN    | 0.74529 | -0.4241   | 0.03884        | 1.4107           | [M+H] <sup>+</sup>                                       | 730.537              | 4.43 |
| Hippuric acid                                  | QIAFMBKCNZACKAUHFFFAOYSA-N  | 0.59177 | -0.7569   | 0.03884        | 1.4107           | [M+H] <sup>+</sup>                                       | 180.065              | 3.38 |
| Alanine                                        | QNAYBMKLOCPYGRHOHCLBHSA-N   | 1.2821  | 0.35849   | 0.04182        | 1.3787           | [M+H] <sup>+</sup>                                       | 90.0542              | 7.79 |
| Glycoursodeoxycholic acid                      | GHCZAUBVMUEKKPTVQURETASAN   | 2.3972  | 1.2614    | 0.04663        | 1.3313           | [M+H-H <sub>2</sub> O] <sup>+</sup>                      | 432.31               | 4.71 |

|                   |                              |         |         |         |        |                                         |                      |      |
|-------------------|------------------------------|---------|---------|---------|--------|-----------------------------------------|----------------------|------|
| Carnitine         | PHIQHXFUZVPYII-ZCFIWIBFSA-N  | 1.2558  | 0.32862 | 0.04663 | 1.3313 | [M+H] <sup>+</sup> _[M+Na] <sup>+</sup> | 162.1127<br>_184.093 | 7.48 |
| PC(O-16:0/20:1).1 | NA                           | 0.82328 | -0.2805 | 0.04663 | 1.3313 | [M+H] <sup>+</sup>                      | 524.372              | 5.16 |
| CAR(16:0)         | XOMRRQXKHYMOC-OAQYLSRUSA-N   | 0.49048 | -1.0277 | 0.04663 | 1.3313 | [M+H] <sup>+</sup>                      | 400.342              | 3.14 |
| Proline           | ONIBWKKTOPOVIA-BYPYZUCNSA-N  | 1.2783  | 0.35426 | 0.04709 | 1.3271 | [M+H] <sup>+</sup>                      | 116.07               | 7.44 |
| PC(16:0/14:0)     | UIXXHROAQSBBOV-PSXMRANNSA-N  | 1.3549  | 0.43818 | 0.04726 | 1.3255 | [M+H] <sup>+</sup>                      | 706.538              | 4.46 |
| LysoPC(15:0)      | RJZVWDITYEWCUAR-JOCHJYFZSA-N | 0.37956 | -1.3976 | 0.04815 | 1.3174 | [M+H] <sup>+</sup> _[M+Na] <sup>+</sup> | 482.3215<br>_504.307 | 5.27 |
| PC(O-16:0/22:6)   | TXHZYNSTTCIWMJ-RXSQUPBGSA-N  | 0.58631 | -0.7703 | 0.05322 | 1.2739 | [M+H] <sup>+</sup>                      | 792.591              | 3.85 |
| N6-Methyllysine   | PQNASZJZHFPQLE-UHFFFAOYSA-N  | 1.4885  | 0.57382 | 0.0591  | 1.2284 | [M+H] <sup>+</sup>                      | 161.128              | 8.99 |
| CAR(10:0)         | LZOSYCMHQXPBFU-OAHLLOKOSA-N  | 0.58469 | -0.7743 | 0.07324 | 1.1353 | [M+H] <sup>+</sup>                      | 316.248              | 4.11 |
| SM(d18:1/24:1)    | UYDFMJRVHYJLQZ-KVICREPESA-N  | 2.2895  | 1.195   | 0.07844 | 1.1055 | [M+H] <sup>+</sup>                      | 813.682              | 4.89 |
| PE(16:0/18:1)     | FHQVHHIBKUMWTI-OTMQOQLSA-N   | 1.3741  | 0.45849 | 0.09024 | 1.0446 | [M+H] <sup>+</sup>                      | 718.537              | 4.58 |

**Tabel S5:** Significant annotated metabolites comparing WD hepatic to HC. Metabolites were selected by volcano plot with fold- change (FC) >1.2 and FDR-adjusted  $p < 0.1$  indicating significance.

| Metabolite Name/Identifier                               | InChI Key                    | FC      | log2 (FC) | FDR $p$ -value | $-\log_{10}$ (p) | Species                                                 | m/z                   | RT   |
|----------------------------------------------------------|------------------------------|---------|-----------|----------------|------------------|---------------------------------------------------------|-----------------------|------|
| Choline                                                  | OEYIOHPDSNJKLS-UHFFFAOYSA-N  | 4.3574  | 2.1235    | 2.18E-13       | 12.661           | [M+H] <sup>+</sup>                                      | 104.1066              | 5.12 |
| Phenylalanine                                            | COLNVLDHVKWLRT-QMMMGPBSA-N   | 2.4547  | 1.2956    | 2.26E-08       | 7.646            | [M+H] <sup>+</sup>                                      | 166.0862              | 6.61 |
| 2-Hydroxy phenethylamine                                 | ULSIYEDSMZIPX-UHFFFAOYSA-N   | 2.415   | 1.2721    | 2.30E-08       | 7.6378           | [M+H-H <sub>2</sub> O] <sup>+</sup>                     | 120.0804              | 6.61 |
| LysoPC(P-18:0)                                           | WBOMIOWRFSPZMC-AYICAFKVSA-N  | 0.44348 | -1.1731   | 4.53E-07       | 6.3443           | [M+H] <sup>+</sup>                                      | 508.3748              | 5.22 |
| LysoPC(24:0)                                             | SKJMUADLQLZAGH-WJOKGBTCSA-N  | 0.69985 | -0.51489  | 0.000182       | 3.7402           | [M+H] <sup>+</sup>                                      | 608.4634              | 5.03 |
| S1P                                                      | DUYSYHSSBDVJSM-KRWOKUGFSA-N  | 0.64404 | -0.63478  | 0.000231       | 3.6359           | [M+H] <sup>+</sup>                                      | 380.2552              | 5.96 |
| PC(18:3/18:3)                                            | XXKFQTOJZELMD-JICBSJGISA-N   | 0.50274 | -0.99211  | 0.000231       | 3.6359           | [M+H] <sup>+</sup>                                      | 778.5374              | 4.18 |
| LysoPC(14:0)                                             | VXUOFDJKYGDUJI-OAQYLSRUSA-N  | 0.53095 | -0.91336  | 0.000313       | 3.5043           | [M+H] <sup>+</sup>                                      | 468.3086              | 5.29 |
| PS(18:0/20:4)                                            | FHHVIBPVBRLOR-IYACIECVSA-N   | 0.41435 | -1.2711   | 0.000313       | 3.5043           | [M+H] <sup>+</sup>                                      | 812.5433              | 5.4  |
| PC(18:1/14:0)                                            | KIVAJCJTPWSRJ-OQHNRNOKSA-N   | 1.8275  | 0.86988   | 0.000493       | 3.3073           | [M+H] <sup>+</sup>                                      | 732.5534              | 4.43 |
| SM(d18:1/18:1)                                           | NBEADXWAAWCCDG-QDDWGVBSQA-N  | 0.7124  | -0.48924  | 0.000764       | 3.1167           | [M+H] <sup>+</sup>                                      | 729.5913              | 4.93 |
| Histidine                                                | HNDVDQJCIGZPNO-YFKPBYRVSA-N  | 1.9135  | 0.93624   | 0.001947       | 2.7106           | [M+H] <sup>+</sup>                                      | 156.0762              | 9.07 |
| LysoPC(18:1)                                             | YAMUFBLWGFFICM-PTGWMXDISA-N  | 0.74108 | -0.4323   | 0.001947       | 2.7106           | [M+H] <sup>+</sup>                                      | 522.3559              | 5.17 |
| Hippuric acid                                            | QIAFMBKCNZACKA-UHFFFAOYSA-N  | 0.44641 | -1.1636   | 0.003238       | 2.4897           | [M+H] <sup>+</sup>                                      | 180.0645              | 3.38 |
| PC(14:0/18:0)                                            | TYAQXZHDAGZOEOKXQOOQHDSA-N   | 2.1634  | 1.1133    | 0.00351        | 2.4547           | [M+H] <sup>+</sup>                                      | 678.5046              | 4.49 |
| Tyrosine                                                 | OUYCCASQSFEME-QMMMGPBSA-N    | 1.8955  | 0.92255   | 0.003674       | 2.4348           | [M+H] <sup>+</sup>                                      | 182.0802              | 7.39 |
| Methionine                                               | FFEARJCKVFRZRR-BYPYZUCNSA-N  | 3.8412  | 1.9416    | 0.004076       | 2.3898           | [M+H] <sup>+</sup> _[M+N-NH <sub>3</sub> ] <sup>+</sup> | 150.0575<br>_133.0308 | 7.16 |
| 7- $\alpha$ -OH-3-oxo-Cholest-4-en-26- $\alpha$ -ic acid | SATGKQGFUDXGAX-SLTBQWEQSA-N  | 1.8093  | 0.8554    | 0.004566       | 2.3405           | [M+H] <sup>+</sup>                                      | 431.3148              | 1.21 |
| PC(16:1/16:1)                                            | GPWHCUUIQMGELEX-VHQDNGOZSA-N | 0.67574 | -0.56546  | 0.005196       | 2.2843           | [M+H] <sup>+</sup>                                      | 730.5372              | 4.43 |
| Kynurenine                                               | YGPSJZOEDVAXAB-QMMMGPBSA-N   | 1.5307  | 0.61421   | 0.006967       | 2.157            | [M+H] <sup>+</sup>                                      | 209.0914              | 6.62 |
| Betaine                                                  | KWIUHFFTVRNATP-UHFFFAOYSA-N  | 1.4629  | 0.54886   | 0.006967       | 2.157            | [M+H] <sup>+</sup>                                      | 118.0863              | 6.98 |
| PC(O-16:0/22:6)                                          | QQQNYAHSSIZBU-HIQXTUQZSA-N   | 0.40111 | -1.3179   | 0.008002       | 2.0968           | [M+H] <sup>+</sup>                                      | 792.5906              | 3.85 |
| Ornithine                                                | AHLPHDHHMVZTML-BYPYZUCNSA-N  | 2.5069  | 1.3259    | 0.008597       | 2.0656           | [M+H] <sup>+</sup>                                      | 133.0961              | 9.27 |
| LysoPC(15:0)                                             | RJZVWDITYEWCUAR-JOCHYFZSA-N  | 0.18868 | -2.406    | 0.008981       | 2.0467           | [M+H] <sup>+</sup> _[M+Na] <sup>+</sup>                 | 482.3215<br>_504.3075 | 5.27 |
| PC(P-18:0/20:4)                                          | FHHVIBPVBRLOR-IYACIECVSA-N   | 1.5977  | 0.67603   | 0.009536       | 2.0206           | [M+H] <sup>+</sup>                                      | 794.6058              | 4.3  |
| PC(20:4/20:4)                                            | LZLVZIFMYXDKCN-QJWFYWCHSA-N  | 0.34292 | -1.5441   | 0.009536       | 2.0206           | [M+H] <sup>+</sup>                                      | 830.5692              | 4    |
| LysoPC(16:0).2                                           | ASWBNKHCZGQVJV-HSZRJFAPSA-N  | 1.3432  | 0.42563   | 0.01187        | 1.9255           | [M+H] <sup>+</sup>                                      | 518.3223              | 5.24 |
| N6-Methyllysine                                          | PQNASZJZHFPQLE-UHFFFAOYSA-N  | 2.0678  | 1.0481    | 0.013173       | 1.8803           | [M+H] <sup>+</sup>                                      | 161.1275              | 8.99 |
| Glycoursodeoxy cholic acid                               | GHCZAUBVMUEKKP-TVQURETASA-N  | 5.1039  | 2.3516    | 0.013505       | 1.8695           | [M+H-H <sub>2</sub> O] <sup>+</sup>                     | 432.3095              | 4.71 |
| PC(16:0/14:0)                                            | UIXXHROAQSBBOV-PSXMRANNSA-N  | 1.5046  | 0.5894    | 0.015233       | 1.8172           | [M+H] <sup>+</sup>                                      | 706.5375              | 4.46 |
| SM(d18:1/12:0)                                           | HZCLJRFPMKWHR-FEBLJDHQA-N    | 0.7391  | -0.43616  | 0.015233       | 1.8172           | [M+H] <sup>+</sup>                                      | 647.5109              | 4.99 |
| CAR(12:0)                                                | FUJLYHJROOYKRA-QGZVFWFLSA-N  | 0.43623 | -1.1969   | 0.015233       | 1.8172           | [M+H] <sup>+</sup>                                      | 344.2791              | 3.69 |
| Acetylcholine                                            | OIPILFWXSMYKGL-UHFFFAOYSA-N  | 1.499   | 0.58399   | 0.017776       | 1.7502           | [M+H] <sup>+</sup>                                      | 146.1168              | 7.52 |
| Palmitoleyl Ethanolamide                                 | WFRLANWAASSSFV-FPLPWBNSA-N   | 1.3211  | 0.40178   | 0.017776       | 1.7502           | [M+H] <sup>+</sup>                                      | 298.274               | 1.02 |

|                       |                              |          |          |          |        |                                                       |                       |      |
|-----------------------|------------------------------|----------|----------|----------|--------|-------------------------------------------------------|-----------------------|------|
| Proline               | ONIBWKKTOPOVIA-BYPYZUCNSA-N  | 1.4851   | 0.57054  | 0.018759 | 1.7268 | [M+H] <sup>+</sup>                                    | 116.0696              | 7.44 |
| 5-Aminopentanoic acid | JJMDCOVWQOJGCB-UHFFFAOYSA-N  | 2.7402   | 1.4543   | 0.019844 | 1.7024 | [M+H-H <sub>2</sub> O] <sup>+</sup>                   | 100.0752              | 1.5  |
| Alanine               | QNA YBMKLOCPYGI-REOHCLBNSA-N | 1.3439   | 0.42646  | 0.019844 | 1.7024 | [M+H] <sup>+</sup>                                    | 90.0542               | 7.79 |
| CAR(10:0)             | RFDAIACWWDREDC-FRVQLJSFSA-N  | 0.5259   | -0.92714 | 0.021989 | 1.6578 | [M+H] <sup>+</sup>                                    | 316.2478              | 4.11 |
| Glycocholic acid      | RFDAIACWWDREDC-FRVQLJSFSA-N  | 4.9625   | 2.3111   | 0.022623 | 1.6454 | [M+H] <sup>+</sup> _[M+NH <sub>4</sub> ] <sup>+</sup> | 483.342<br>_466.3154  | 5.89 |
| PHE-PHE               | GKZIWHRNKRBEOH-UHFFFAOYSA-N  | 0.60592  | -0.72279 | 0.024145 | 1.6172 | [M+H] <sup>+</sup>                                    | 313.1546              | 5.57 |
| Lyso PAF C-16         | VLBPIWYTPAXCFJ-UHFFFAOYSA-N  | 1.4482   | 0.53426  | 0.036462 | 1.4382 | [M+H] <sup>+</sup>                                    | 482.3582              | 5.27 |
| Trigonelline          | WWNNZCOKKKDOPX-UHFFFAOYSA-N  | 138.0544 | -1.7781  | 0.038987 | 1.4091 | [M+H] <sup>+</sup>                                    | 138.0544              | 7.2  |
| Acetylcarnitine       | RDHQFKQIGNGIED-MRVPVSSYSA-O  | 1.3438   | 0.42632  | 0.042535 | 1.3713 | [M+H] <sup>+</sup>                                    | 204.1234              | 6.95 |
| PC(O-16:0/20:1).1     | NA                           | 0.82713  | -0.27381 | 0.042535 | 1.3713 | [M+H] <sup>+</sup>                                    | 524.3716              | 5.16 |
| PE(O-18:1/20:4)       | URPXXNCTXCOATD-FXMFQVEGSA-N  | 0.50772  | -0.9779  | 0.050332 | 1.2982 | [M+H] <sup>+</sup>                                    | 752.5604              | 3.81 |
| PC(P-18:0/22:6)       | TXHZYNSTTCIWMJ-RXSQUPBGSA-N  | 1.491    | 0.57628  | 0.051153 | 1.2911 | [M+H] <sup>+</sup>                                    | 818.605               | 4.28 |
| PC(O-16:0/20:4)       | NA                           | 1.2836   | 0.36024  | 0.084826 | 1.0715 | [M+H] <sup>+</sup>                                    | 768.5897              | 4.33 |
| 3-Methylhistidine     | JDHILDINMRGULE-LURJTMIESA-N  | 1.9118   | 0.93494  | 0.096339 | 1.0162 | [M+H] <sup>+</sup>                                    | 170.0917              | 9.1  |
| PI(18:0/20:4)         | KRTOMQDUKGRFDJ-MWZLTEOLSA-N  | 0.82755  | -0.27308 | 0.096339 | 1.0162 | [M+H] <sup>+</sup> _[M+NH <sub>4</sub> ] <sup>+</sup> | 904.5929<br>_887.5652 | 5.48 |

**Table S6:** Metabolite correlation analysis with choline. Correlation coefficients were calculated based on Pearson's correlation with  $p < 0.05$  indicating significance.

| Metabolite                | correlation | <i>t</i> -stat | <i>p</i> -value | FDR <i>p</i> -value |
|---------------------------|-------------|----------------|-----------------|---------------------|
| Phenylalanine             | 0.78285     | 10.75          | 1.07E-16        | 3.95E-15            |
| LysoPC(14:0)              | -0.67477    | -7.8116        | 3.18E-11        | 7.84E-10            |
| PC(14:0/18:0)             | 0.65672     | 7.4403         | 1.58E-10        | 2.92E-09            |
| LysoPC(18:1)              | -0.64136    | -7.1423        | 5.67E-10        | 8.39E-09            |
| PC(P-18:0/20:4)           | 0.6345      | 7.0138         | 9.82E-10        | 1.21E-08            |
| PC(O-16:0/2:0).1          | -0.62883    | -6.9099        | 1.53E-09        | 1.62E-08            |
| S1P                       | -0.62261    | -6.798         | 2.46E-09        | 2.28E-08            |
| Histidine                 | 0.60254     | 6.4506         | 1.07E-08        | 8.79E-08            |
| LysoPC(P-18:0)            | -0.59826    | -6.379         | 1.44E-08        | 1.07E-07            |
| PC(18:1/14:0)             | 0.57975     | 6.0793         | 5.03E-08        | 3.23E-07            |
| LysoPC(24:0)              | -0.5791     | -6.0691        | 5.24E-08        | 3.23E-07            |
| Ornithine                 | 0.56956     | 5.9205         | 9.67E-08        | 5.51E-07            |
| Alanine                   | 0.5419      | 5.509          | 5.14E-07        | 2.72E-06            |
| PC(P-18:0/22:6)           | 0.53696     | 5.4383         | 6.82E-07        | 3.36E-06            |
| PC(O-16:0/22:6)           | -0.52538    | -5.2755        | 1.30E-06        | 6.02E-06            |
| PC(O-16:0/2:0).2          | -0.51975    | -5.198         | 1.77E-06        | 7.68E-06            |
| CAR(12:0)                 | -0.51847    | -5.1805        | 1.89E-06        | 7.77E-06            |
| PS(18:0/20:4)             | -0.50082    | -4.9436        | 4.74E-06        | 1.84E-05            |
| PC(O-16:0/20:4)           | 0.49988     | 4.9313         | 4.97E-06        | 1.84E-05            |
| Tyrosine                  | 0.49827     | 4.9101         | 5.39E-06        | 1.90E-05            |
| Betaine                   | 0.49619     | 4.883          | 5.98E-06        | 2.01E-05            |
| Proline                   | 0.48422     | 4.7285         | 1.07E-05        | 3.46E-05            |
| Carnitine                 | 0.48105     | 4.6882         | 1.25E-05        | 3.85E-05            |
| SM(d18:1/18:1)            | -0.47946    | -4.6681        | 1.35E-05        | 3.99E-05            |
| LysoPC(P-16:0)            | -0.47674    | -4.6337        | 1.53E-05        | 4.36E-05            |
| Kynurenine                | 0.46938     | 4.5418         | 2.16E-05        | 5.91E-05            |
| Methionine                | 0.46714     | 4.5141         | 2.39E-05        | 6.31E-05            |
| PC(18:3/18:3)             | -0.46356    | -4.4699        | 2.81E-05        | 7.17E-05            |
| LysoPC(15:0)              | -0.45408    | -4.3545        | 4.28E-05        | 0.00010555          |
| PC(16:0/14:0)             | 0.444       | 4.2337         | 6.60E-05        | 0.00015762          |
| PI(18:0/20:4)             | -0.43925    | -4.1775        | 8.06E-05        | 0.00018649          |
| SM(d18:1/18:0)            | 0.42464     | 4.0074         | 0.0001464       | 0.00032829          |
| CAR(16:0)                 | -0.41967    | -3.9503        | 0.00017826      | 0.00038798          |
| LysoPC(16:0).1            | -0.41242    | -3.868         | 0.00023618      | 0.00049934          |
| PC(18:1/18:1)             | 0.40541     | 3.7892         | 0.00030829      | 0.0006337           |
| PC(O-18:1/2:0)            | -0.38708    | -3.5868        | 0.00060209      | 0.0012042           |
| Gal ceramide (d18:1/24:1) | 0.38412     | 3.5546         | 0.00066844      | 0.0013017           |



|                           |           |           |           |           |
|---------------------------|-----------|-----------|-----------|-----------|
| Glycoursodeoxycholic acid | 0.36504   | 3.3501    | 0.0012813 | 0.0024313 |
| PC(18:0/22:6)             | 0.36292   | 3.3277    | 0.0013738 | 0.0025416 |
| LysoPC(16:0).2            | 0.36162   | 3.314     | 0.0014339 | 0.002588  |
| CAR(10:0)                 | -0.35951  | -3.2917   | 0.0015362 | 0.0027067 |
| Lyso(PE18:1)              | -0.3479   | -3.1705   | 0.0022248 | 0.0037199 |
| Glycocholic acid          | 0.34752   | 3.1666    | 0.0022514 | 0.0037199 |
| SMd(18:1/12:0)            | -0.34737  | -3.165    | 0.0022621 | 0.0037199 |
| PC(16:1/16:1)             | -0.34611  | -3.152    | 0.0023528 | 0.0037291 |
| PE(16:0/18:1)             | 0.34532   | 3.1438    | 0.0024113 | 0.0037291 |
| PC(O-16:0/20:5)           | -0.34522  | -3.1428   | 0.0024189 | 0.0037291 |
| CAR(18:1)                 | -0.33834  | -3.072    | 0.0029874 | 0.0045116 |
| Leucine                   | 0.33095   | 2.9965    | 0.0037292 | 0.0055192 |
| SMd(18:1/24:1)            | 0.31426   | 2.8284    | 0.0060357 | 0.0087577 |
| PC(20:4/20:4)             | -0.273    | -2.4246   | 0.0178    | 0.02533   |
| PC(18:0/18:1)             | -0.27215  | -2.4164   | 0.018174  | 0.025374  |
| LysoPC(18:0)              | -0.2604   | -2.3044   | 0.02405   | 0.032958  |
| PC(18:0/18:0)             | 0.2553    | 2.256     | 0.027064  | 0.036339  |
| PE(O-18:1/20:4)           | -0.2546   | -2.2494   | 0.0275    | 0.036339  |
| LysoPE(18:0)              | -0.25156  | -2.2208   | 0.02947   | 0.03826   |
| Acetylcarnitine           | 0.23095   | 2.0281    | 0.046202  | 0.058947  |
| Lyso PAF C-16             | 0.20636   | 1.802     | 0.075681  | 0.094922  |
| PC(16:0/18:2)             | 0.19049   | 1.6579    | 0.10162   | 0.12534   |
| Acetylcholine             | 0.18224   | 1.5836    | 0.11761   | 0.14267   |
| PC(20:1/20:1)             | 0.11639   | 1.0012    | 0.32002   | 0.38196   |
| PE(16:0/18:2)             | 0.098718  | 0.84759   | 0.39944   | 0.46918   |
| Isoleucine                | 0.079209  | 0.6789    | 0.49935   | 0.57737   |
| PC(16:0/18:1)             | 0.063271  | 0.54168   | 0.58969   | 0.67134   |
| PC(16:0/22:6)             | -0.060903 | -0.52132  | 0.60372   | 0.6769    |
| TMAO                      | 0.036081  | 0.30848   | 0.7586    | 0.83785   |
| Cholesterol               | 0.032133  | 0.27468   | 0.78434   | 0.85354   |
| PC(16:0/18:0)             | 0.023331  | 0.1994    | 0.84251   | 0.90356   |
| Tryptophan                | 0.020291  | 0.1734    | 0.86282   | 0.91212   |
| PE(18:0/22:6)             | 0.017483  | 0.14939   | 0.88166   | 0.91891   |
| PC(14:0/14:0)             | 0.015561  | 0.13297   | 0.89458   | 0.91943   |
| Deoxycholic acid          | -0.011273 | -0.096324 | 0.92353   | 0.93618   |
| PC(O-16:0/20:3)           | 0.0050072 | 0.042782  | 0.96599   | 0.96599   |

**Table S7:** Metabolite correlation analysis with phenylalanine. Correlations coefficients were calculated based on Pearson's correlation with  $p < 0.05$  indicating significance.

| Metabolite                | Correlation | <i>t</i> -stat | <i>p</i> -value | FDR <i>p</i> -value |
|---------------------------|-------------|----------------|-----------------|---------------------|
| Choline                   | 0.78285     | 10.75          | 1.07E-16        | 3.95E-15            |
| Kynurenine                | 0.71661     | 8.7785         | 4.85E-13        | 1.20E-11            |
| Ornithine                 | 0.68024     | 7.929          | 1.91E-11        | 3.54E-10            |
| LysoPC(P-18:0)            | -0.67262    | -7.7662        | 3.87E-11        | 5.73E-10            |
| Histidine                 | 0.6656      | 7.62           | 7.27E-11        | 8.20E-10            |
| Alanine                   | 0.66487     | 7.6051         | 7.76E-11        | 8.20E-10            |
| PC(14:0/18:0)             | 0.6622      | 7.5506         | 9.81E-11        | 9.07E-10            |
| Methionine                | 0.65379     | 7.3824         | 2.02E-10        | 1.66E-09            |
| Tyrosine                  | 0.64632     | 7.2367         | 3.78E-10        | 2.80E-09            |
| Proline                   | 0.64466     | 7.205          | 4.33E-10        | 2.92E-09            |
| LysoPC(14:0)              | -0.62219    | -6.7904        | 2.54E-09        | 1.57E-08            |
| LysoPC(18:1)              | -0.60125    | -6.4289        | 1.17E-08        | 6.66E-08            |
| PC(O-16:0/2:0).1          | -0.58175    | -6.111         | 4.41E-08        | 2.33E-07            |
| S1P                       | -0.57324    | -5.9774        | 7.66E-08        | 3.78E-07            |
| Betaine                   | 0.56287     | 5.8184         | 1.47E-07        | 6.80E-07            |
| PC(18:1/14:0)             | 0.5494      | 5.6179         | 3.32E-07        | 1.44E-06            |
| Glycoursodeoxycholic acid | 0.54624     | 5.5717         | 4.00E-07        | 1.64E-06            |
| PC(O-16:0/2:0).2          | -0.53322    | -5.3853        | 8.42E-07        | 3.14E-06            |
| PC(P-18:0/20:4)           | 0.5331      | 5.3837         | 8.48E-07        | 3.14E-06            |
| Carnitine                 | 0.51775     | 5.1707         | 1.96E-06        | 6.92E-06            |
| LysoPC(P-16:0)            | -0.51274    | -5.1027        | 2.56E-06        | 8.62E-06            |
| SM(d18:1/18:1)            | -0.50177    | -4.9562        | 4.52E-06        | 1.45E-05            |
| PC(18:3/18:3)             | -0.49334    | -4.8458        | 6.89E-06        | 2.12E-05            |
| PC(18:1/18:1)             | 0.49047     | 4.8086         | 7.94E-06        | 2.35E-05            |
| Glycocholic acid          | 0.48672     | 4.7605         | 9.52E-06        | 2.71E-05            |
| Leucine                   | 0.48405     | 4.7263         | 1.08E-05        | 2.97E-05            |
| PE(16:0/18:1)             | 0.47874     | 4.6589         | 1.40E-05        | 3.69E-05            |
| LysoPC(15:0)              | -0.47104    | -4.5624        | 2.00E-05        | 5.10E-05            |
| PC(16:0/14:0)             | 0.46886     | 4.5353         | 2.21E-05        | 5.45E-05            |
| PC(O-16:0/20:4)           | 0.46517     | 4.4898         | 2.61E-05        | 6.24E-05            |
| LysoPC(16:0).1            | -0.4626     | -4.4581        | 2.93E-05        | 6.78E-05            |
| PC(O-18:1/2:0)            | -0.45834    | -4.4061        | 3.55E-05        | 7.96E-05            |
| CAR(12:0)                 | -0.43876    | -4.1718        | 8.23E-05        | 0.00017911          |
| PC(16:1/16:1)             | -0.42845    | -4.0513        | 0.00012567      | 0.00026569          |
| PS(18:0/20:4)             | -0.42178    | -3.9745        | 0.00016403      | 0.00033718          |
| PC(P-18:0/22:6)           | 0.40446     | 3.7786         | 0.00031948      | 0.00063896          |
| CAR(10:0)                 | -0.38385    | -3.5517        | 0.00067482      | 0.0013141           |
| LysoPC(24:0)              | -0.38077    | -3.5184        | 0.00075141      | 0.0014258           |
| Gal ceramide (d18:1/24:1) | 0.37736     | 3.4816         | 0.00084552      | 0.0015642           |

|                  |           |          |           |           |
|------------------|-----------|----------|-----------|-----------|
| LysoPC(18:0)     | -0.37017  | -3.4046  | 0.0010796 | 0.0019486 |
| PC(O-16:0/22:6)  | -0.35908  | -3.2872  | 0.0015576 | 0.0027444 |
| PI(18:0/20:4)    | -0.34916  | -3.1836  | 0.0021388 | 0.0036808 |
| LysoPC(16:0).2   | 0.33856   | 3.0742   | 0.0029679 | 0.0049914 |
| SMd(18:1/24:1)   | 0.33167   | 3.0039   | 0.0036504 | 0.0060028 |
| CAR(18:1)        | -0.32369  | -2.923   | 0.0046131 | 0.0074211 |
| SM(d18:1/18:0)   | 0.31728   | 2.8585   | 0.0055434 | 0.008728  |
| CAR(16:0)        | -0.3157   | -2.8428  | 0.005796  | 0.0089355 |
| PC(20:4/20:4)    | -0.29113  | -2.6     | 0.011275  | 0.017028  |
| SMd(18:1/12:0)   | -0.28137  | -2.5052  | 0.014468  | 0.021412  |
| LysoPE(18:0)     | -0.27456  | -2.4396  | 0.017132  | 0.024858  |
| PC(16:0/22:6)    | -0.25211  | -2.2259  | 0.029108  | 0.041423  |
| PE(O-18:1/20:4)  | -0.24841  | -2.1911  | 0.031637  | 0.044173  |
| PC(18:0/22:6)    | 0.23607   | 2.0757   | 0.041446  | 0.056796  |
| Tryptophan       | 0.22615   | 1.9837   | 0.051055  | 0.068692  |
| Acetylcholine    | 0.21979   | 1.9249   | 0.058133  | 0.076818  |
| PC(O-16:0/20:5)  | -0.21409  | -1.8726  | 0.065131  | 0.084557  |
| Isoleucine       | 0.21283   | 1.861    | 0.066768  | 0.085187  |
| PE(16:0/18:2)    | 0.21107   | 1.845    | 0.069096  | 0.086662  |
| PC(16:0/18:2)    | 0.20773   | 1.8145   | 0.073714  | 0.090914  |
| Lyso PAF C-16    | 0.20283   | 1.7698   | 0.080942  | 0.098192  |
| Lyso(PE18:1)     | -0.19675  | -1.7145  | 0.090671  | 0.10822   |
| PC(20:1/20:1)    | 0.19255   | 1.6765   | 0.097909  | 0.115     |
| TMAO             | 0.18835   | 1.6386   | 0.10561   | 0.12211   |
| Acetylcarnitine  | 0.17263   | 1.4975   | 0.13859   | 0.15777   |
| PC(18:0/18:0)    | 0.16592   | 1.4376   | 0.15483   | 0.1736    |
| PC(18:0/18:1)    | -0.1649   | -1.4285  | 0.15743   | 0.17387   |
| PC(14:0/14:0)    | 0.10626   | 0.91305  | 0.36422   | 0.39636   |
| Cholesterol      | 0.10285   | 0.88344  | 0.3799    | 0.40743   |
| PC(16:0/18:1)    | -0.0815   | -0.69866 | 0.48699   | 0.51207   |
| PE(18:0/22:6)    | 0.080695  | 0.69172  | 0.49131   | 0.51207   |
| PC(O-16:0/20:3)  | 0.073132  | 0.62651  | 0.53293   | 0.54774   |
| Deoxycholic acid | 0.054473  | 0.46611  | 0.64253   | 0.65133   |
| PC(16:0/18:0)    | -0.014654 | -0.12522 | 0.9007    | 0.9007    |

**Table S8:** Metabolite correlation analysis with methionine. Correlations coefficients were calculated based on Pearson's correlation with  $p < 0.05$  indicating significance.

| Metabolite                | Correlation | <i>t</i> -stat | <i>p</i> -value | FDR <i>p</i> -value |
|---------------------------|-------------|----------------|-----------------|---------------------|
| Betaine                   | 0.82558     | 12.5           | 8.11E-20        | 3.00E-18            |
| Proline                   | 0.74838     | 9.6404         | 1.18E-14        | 2.92E-13            |
| Tyrosine                  | 0.70885     | 8.5864         | 1.11E-12        | 2.06E-11            |
| SM(d18:1/18:1)            | -0.69699    | -8.3046        | 3.77E-12        | 5.58E-11            |
| Glycoursodeoxycholic acid | 0.68654     | 8.0675         | 1.05E-11        | 1.30E-10            |
| LysoPC(P-18:0)            | -0.65772    | -7.4603        | 1.45E-10        | 1.53E-09            |
| Phenylalanine             | 0.65379     | 7.3824         | 2.02E-10        | 1.87E-09            |
| Histidine                 | 0.64291     | 7.1715         | 5.00E-10        | 4.11E-09            |
| PC(16:0/14:0)             | 0.61806     | 6.7173         | 3.47E-09        | 2.57E-08            |
| PC(14:0/18:0)             | 0.61513     | 6.6661         | 4.31E-09        | 2.90E-08            |
| Kynurenine                | 0.596       | 6.3417         | 1.69E-08        | 1.04E-07            |
| LysoPC(16:0).1            | -0.58055    | -6.0919        | 4.77E-08        | 2.72E-07            |
| PC(18:3/18:3)             | -0.55698    | -5.73          | 2.11E-07        | 1.11E-06            |
| LysoPC(16:0).2            | 0.55385     | 5.6834         | 2.54E-07        | 1.26E-06            |
| PC(18:1/14:0)             | 0.53623     | 5.4278         | 7.11E-07        | 3.29E-06            |
| PC(O-16:0/20:4)           | 0.53008     | 5.3412         | 1.00E-06        | 4.37E-06            |
| PC(16:0/22:6)             | -0.52137    | -5.2202        | 1.62E-06        | 6.65E-06            |
| PC(O-16:0/2:0).1          | -0.51847    | -5.1805        | 1.89E-06        | 7.36E-06            |
| Glycocholic acid          | 0.51191     | 5.0914         | 2.68E-06        | 9.90E-06            |
| PC(18:1/18:1)             | 0.50407     | 4.9866         | 4.02E-06        | 1.42E-05            |
| S1P                       | -0.49904    | -4.9203        | 5.18E-06        | 1.74E-05            |
| Alanine                   | 0.47497     | 4.6115         | 1.67E-05        | 5.36E-05            |
| Ornithine                 | 0.47308     | 4.5879         | 1.82E-05        | 5.61E-05            |
| PC(16:0/18:1)             | -0.46893    | -4.5362        | 2.20E-05        | 6.52E-05            |
| Choline                   | 0.46714     | 4.5141         | 2.39E-05        | 6.65E-05            |
| PC(P-18:0/20:4)           | 0.46668     | 4.5084         | 2.44E-05        | 6.65E-05            |
| PI(18:0/20:4)             | -0.466      | -4.4999        | 2.52E-05        | 6.65E-05            |
| PE(16:0/18:1)             | 0.46447     | 4.4812         | 2.70E-05        | 6.88E-05            |
| Leucine                   | 0.43841     | 4.1677         | 8.35E-05        | 0.00020599          |
| PC(O-16:0/2:0).2          | -0.42314    | -3.9901        | 0.00015541      | 0.00037098          |
| LysoPC(14:0)              | -0.41801    | -3.9315        | 0.0001902       | 0.00043984          |
| Acetylcholine             | 0.41587     | 3.907          | 0.00020678      | 0.00046369          |
| PC(14:0/14:0)             | 0.39262     | 3.6474         | 0.00049384      | 0.0010748           |
| CAR(10:0)                 | -0.36295    | -3.328         | 0.0013727       | 0.0029024           |
| TMAO                      | 0.34668     | 3.1579         | 0.0023114       | 0.0047511           |
| Tryptophan                | 0.31885     | 2.8743         | 0.0053019       | 0.010394            |
| Isoleucine                | 0.31861     | 2.8719         | 0.0053377       | 0.010394            |

|                           |            |           |           |          |
|---------------------------|------------|-----------|-----------|----------|
| PE(O-18:1/20:4)           | -0.30846   | -2.7706   | 0.0070917 | 0.013456 |
| Carnitine                 | 0.30317    | 2.7182    | 0.008194  | 0.015159 |
| PC(18:0/18:0)             | 0.29153    | 2.604     | 0.011157  | 0.020137 |
| Gal ceramide (d18:1/24:1) | 0.29048    | 2.5937    | 0.011466  | 0.020202 |
| PC(O-18:1/2:0)            | -0.28399   | -2.5306   | 0.013543  | 0.023306 |
| PC(P-18:0/22:6)           | 0.27058    | 2.4015    | 0.018877  | 0.031135 |
| Cholesterol               | 0.27046    | 2.4003    | 0.018934  | 0.031135 |
| Acetylcarnitine           | 0.2416     | 2.1272    | 0.036779  | 0.059166 |
| PC(20:1/20:1)             | 0.23464    | 2.0623    | 0.042736  | 0.067287 |
| PC(20:4/20:4)             | -0.2282    | -2.0026   | 0.04894   | 0.075449 |
| LysoPE(18:0)              | -0.22699   | -1.9913   | 0.050185  | 0.07579  |
| CAR(12:0)                 | -0.22528   | -1.9756   | 0.051983  | 0.076935 |
| PC(O-16:0/22:6)           | -0.21598   | -1.89     | 0.062733  | 0.090437 |
| PC(O-16:0/20:5)           | -0.21448   | -1.8762   | 0.064627  | 0.090437 |
| PC(O-16:0/20:3)           | 0.21343    | 1.8666    | 0.065974  | 0.090437 |
| LysoPC(15:0)              | -0.21342   | -1.8665   | 0.065994  | 0.090437 |
| PC(16:1/16:1)             | -0.20659   | -1.804    | 0.075358  | 0.10139  |
| LysoPC(18:1)              | -0.19303   | -1.6808   | 0.097067  | 0.12827  |
| CAR(18:1)                 | -0.18175   | -1.5792   | 0.11862   | 0.154    |
| PC(16:0/18:0)             | 0.16337    | 1.4148    | 0.16138   | 0.20589  |
| PC(16:0/18:2)             | 0.16152    | 1.3984    | 0.16622   | 0.20848  |
| PE(18:0/22:6)             | -0.15741   | -1.3619   | 0.17743   | 0.21883  |
| PS(18:0/20:4)             | -0.15335   | -1.3259   | 0.189     | 0.22927  |
| PC(18:0/22:6)             | -0.14168   | -1.2228   | 0.22532   | 0.26893  |
| Lyso PAF C-16             | 0.12484    | 1.075     | 0.2859    | 0.33582  |
| Lyso(PE18:1)              | 0.12195    | 1.0498    | 0.29727   | 0.33921  |
| LysoPC(P-16:0)            | -0.12178   | -1.0483   | 0.29796   | 0.33921  |
| SMd(18:1/12:0)            | 0.099904   | 0.85787   | 0.39377   | 0.4415   |
| PE(16:0/18:2)             | 0.094416   | 0.81031   | 0.42039   | 0.46431  |
| LysoPC(24:0)              | -0.088926  | -0.76281  | 0.44804   | 0.48757  |
| CAR(16:0)                 | -0.061345  | -0.52512  | 0.60109   | 0.64465  |
| SMd(18:1/24:1)            | 0.057931   | 0.4958    | 0.62153   | 0.65704  |
| Deoxycholic acid          | -0.040352  | -0.34505  | 0.73105   | 0.76194  |
| LysoPC(18:0)              | -0.03866   | -0.33056  | 0.74192   | 0.76253  |
| SM(d18:1/18:0)            | 0.031214   | 0.26682   | 0.79036   | 0.80118  |
| PC(18:0/18:1)             | -0.0092433 | -0.078979 | 0.93727   | 0.93727  |

**Table S9:** Pathway analysis results. Statistical *p*-values are determined by enrichment analysis and adjusted for multiple testing. Pathway impact is determined by pathway topology analysis. “Total” = total number of compounds in the pathway; “Hits” = matched number of metabolites from the current analysis; “Raw *p*-value” = original *p*-value calculated from the enrichment analysis; “Holm adjust” = *p*-value adjusted by Holm-Bonferroni method; “FDR *p*-value” = *p*-value adjusted using the false discovery rate; “Impact” = pathway impact value calculated from pathway topology analysis.

| Pathway                                                              | Total | Expected | Hits | Raw <i>p</i> -value | -log(p)  | Holm adjust | FDR <i>p</i> -value | Impact |
|----------------------------------------------------------------------|-------|----------|------|---------------------|----------|-------------|---------------------|--------|
| Beta Oxidation of Very Long Chain Fatty Acids                        | 13    | 0.63     | 2    | 1.28E-01            | 2.05E+00 | 1.00E+00    | 1.00E+00            | 0.05   |
| Betaine Metabolism                                                   | 18    | 0.87     | 2    | 2.16E-01            | 1.53E+00 | 1.00E+00    | 1.00E+00            | 0.14   |
| Oxidation of Branched Chain Fatty Acids                              | 22    | 1.07     | 2    | 2.90E-01            | 1.24E+00 | 1.00E+00    | 1.00E+00            | 0.00   |
| Phospholipid Biosynthesis                                            | 25    | 1.21     | 2    | 3.45E-01            | 1.06E+00 | 1.00E+00    | 1.00E+00            | 0.09   |
| Phenylalanine and Tyrosine Metabolism                                | 25    | 1.21     | 2    | 3.45E-01            | 1.06E+00 | 1.00E+00    | 1.00E+00            | 0.22   |
| Beta-Alanine Metabolism                                              | 26    | 1.26     | 2    | 3.63E-01            | 1.01E+00 | 1.00E+00    | 1.00E+00            | 0.00   |
| Phosphatidylethanolamine Biosynthesis                                | 13    | 0.63     | 1    | 4.79E-01            | 7.37E-01 | 1.00E+00    | 1.00E+00            | 0.00   |
| Catecholamine Biosynthesis                                           | 14    | 0.68     | 1    | 5.04E-01            | 6.85E-01 | 1.00E+00    | 1.00E+00            | 0.00   |
| Histidine Metabolism                                                 | 35    | 1.70     | 2    | 5.16E-01            | 6.62E-01 | 1.00E+00    | 1.00E+00            | 0.24   |
| Sphingolipid Metabolism                                              | 36    | 1.75     | 2    | 5.31E-01            | 6.62E-01 | 1.00E+00    | 1.00E+00            | 0.07   |
| Carnitine Synthesis                                                  | 16    | 0.78     | 1    | 5.52E-01            | 6.33E-01 | 1.00E+00    | 1.00E+00            | 0.00   |
| Methionine Metabolism                                                | 39    | 1.89     | 2    | 5.76E-01            | 5.94E-01 | 1.00E+00    | 1.00E+00            | 0.04   |
| Fatty Acid Metabolism                                                | 40    | 1.94     | 2    | 5.90E-01            | 5.52E-01 | 1.00E+00    | 1.00E+00            | 0.00   |
| Phosphatidylcholine Biosynthesis                                     | 18    | 0.87     | 1    | 5.95E-01            | 5.28E-01 | 1.00E+00    | 1.00E+00            | 0.00   |
| Mitochondrial $\beta$ -Oxidation of Long Chain Saturated Fatty Acids | 24    | 1.17     | 1    | 7.01E-01            | 3.55E-01 | 1.00E+00    | 1.00E+00            | 0.00   |
| Glycine and Serine Metabolism                                        | 50    | 2.43     | 2    | 7.13E-01            | 3.38E-01 | 1.00E+00    | 1.00E+00            | 0.00   |
| Ammonia Recycling                                                    | 25    | 1.21     | 1    | 7.16E-01            | 3.34E-01 | 1.00E+00    | 1.00E+00            | 0.00   |
| Porphyrin Metabolism                                                 | 36    | 1.75     | 1    | 8.39E-01            | 1.76E-01 | 1.00E+00    | 1.00E+00            | 0.00   |
| Tyrosine Metabolism                                                  | 55    | 2.67     | 1    | 9.40E-01            | 6.17E-02 | 1.00E+00    | 1.00E+00            | 0.00   |
| Tryptophan Metabolism                                                | 55    | 2.67     | 1    | 9.40E-01            | 6.17E-02 | 1.00E+00    | 1.00E+00            | 0.09   |
| Bile Acid Biosynthesis                                               | 59    | 2.87     | 1    | 9.52E-01            | 4.97E-02 | 1.00E+00    | 1.00E+00            | 0.00   |
| Arachidonic Acid Metabolism                                          | 65    | 3.16     | 1    | 9.65E-01            | 3.59E-02 | 1.00E+00    | 1.00E+00            | 0.00   |

**Table S10:** Subject characteristics by clinical presentation. Data are expressed as mean  $\pm$  SD. Statistical difference between groups was calculated by one-way ANOVA, with  $p$ -value  $<0.05$  indicating significance.

|                          | Healthy Control<br>(n=15) | WD Pre-clinical<br>(n=12) | WD Neurologic<br>(n=22) | WD Hepatic<br>(n=26) | $p$ -value |
|--------------------------|---------------------------|---------------------------|-------------------------|----------------------|------------|
| Male (%)                 | 5 (33.3%)                 | 5 (41.6%)                 | 13 (59.0%)              | 12 (46.1%)           | -          |
| Female (%)               | 10 (66.6%)                | 7 (58.3%)                 | 9 (40.9%)               | 14 (53.8)            |            |
| Age (years)              | 36.13 $\pm$ 9.20          | 31.25 $\pm$ 13.22         | 36.50 $\pm$ 11.47       | 33.08 $\pm$ 11.50    | 0.503      |
| BMI (Kg/m <sup>2</sup> ) | 23.52 $\pm$ 3.88          | 25.56 $\pm$ 3.30          | 26.01 $\pm$ 6.30        | 25.31 $\pm$ 4.47     | 0.480      |

**Table S11:** List of internal standards used for quality control. RT, retention time; m/z, mass-to-charge ratio.

| Metabolite name                | Species             | m/z      | RT   |
|--------------------------------|---------------------|----------|------|
| 1_15N2-L-Arginine iSTD         | [2M+H] <sup>+</sup> | 177.1122 | 9.15 |
| 1_CUDA iSTD                    | [M+H] <sup>+</sup>  | 341.2809 | 1.15 |
| 1_D3-1-Methylnicotinamide iSTD | [M-H] <sup>-</sup>  | 141.0937 | 6.03 |
| 1_D3-Creatine iSTD             | [M+H] <sup>+</sup>  | 135.0952 | 7.78 |
| 1_D3-Creatinine iSTD           | [M+H] <sup>+</sup>  | 117.0846 | 4.88 |
| 1_D3-DL-Alanine iSTD           | [M+H] <sup>+</sup>  | 93.0731  | 7.80 |
| 1_D3-DL-Aspartic acid iSTD     | [M-H] <sup>-</sup>  | 137.0626 | 8.89 |
| 1_D3-DL-Glutamic acid iSTD     | [M+H] <sup>+</sup>  | 151.0785 | 8.45 |
| 1_D3-Histamine, N-methyl- iSTD | [M+H] <sup>+</sup>  | 129.1207 | 7.10 |
| 1_D3-L-Carnitine iSTD          | [M+H] <sup>+</sup>  | 165.131  | 7.47 |
| 1_D5-L-Glutamine iSTD          | [M+H] <sup>+</sup>  | 152.1069 | 8.29 |
| 1_D9-Betaine iSTD              | [M+H] <sup>-</sup>  | 127.142  | 6.99 |
| 1_D9-Butyrobetaine iSTD        | [M+H] <sup>+</sup>  | 155.174  | 7.45 |
| 1_D9-Caffeine iSTD             | [M+H] <sup>+</sup>  | 204.1438 | 1.21 |
| 1_D9-Choline iSTD              | [M+H] <sup>+</sup>  | 113.1627 | 5.10 |
| 1_D9-Crotonobetaine iSTD       | [M+H] <sup>+</sup>  | 153.1582 | 7.53 |
| 1_D9-TMAO iSTD                 | [M+H] <sup>+</sup>  | 85.1316  | 5.39 |
| 1_Val-Tyr-Val iSTD             | [M+H] <sup>+</sup>  | 380.2181 | 6.64 |



**Table S12:** List of primers for mouse gene expression.

| Gene           | Gene name                                              | Primer | Sequence 5' to 3'        | Exon-exon overlap | % Primer efficiency |
|----------------|--------------------------------------------------------|--------|--------------------------|-------------------|---------------------|
| <i>Aldh7a1</i> | aldehyde dehydrogenase family 7, member A1             | F      | CCTGGGACCCCAATATCCTC     | Yes               | 100.5               |
|                |                                                        | R      | ACCTTGCCCCCATAGACCAC     | No                |                     |
| <i>Bhmt</i>    | Betaine-homocysteine methyltransferase 2               | F      | TTGGATTGGAACCCCGAGT      | Yes               | 104.0               |
|                |                                                        | R      | CCTGATGTGGTAGGGCTCAAA    | No                |                     |
| <i>Bhmt2</i>   | Betaine-homocysteine methyltransferase                 | F      | GAAAGAGGGCCTCAGAGATGC    | No                | 101.5               |
|                |                                                        | R      | GGATACTCTGGGAGGTCCACAA   | No                |                     |
| <i>Chdh</i>    | Choline dehydrogenase                                  | F      | GAAGCCCCGACAGCTATTCC     | No                | 101.8               |
|                |                                                        | R      | ACTTCCAGACAACCCAGCA      | No                |                     |
| <i>Chpt1</i>   | Choline phosphotransferase 1                           | F      | AAGCACCGGAACAGGTTCAA     | Yes               | 101.7               |
|                |                                                        | R      | CATGAAACAGCAGCAGCAAGA    | No                |                     |
| <i>Gapdh</i>   | glyceraldehyde-3-phosphate dehydrogenase               | F      | GAAGCTTGTCAACGCGGAAG     | No                | 102.1               |
|                |                                                        | R      | TTTGATGTTAGTGGGGTCTCGC   | No                |                     |
| <i>Mat1a</i>   | methionine adenosyltransferase I, alpha                | F      | TCTGTCCCATACTCACCTCTTCAG | No                | 98.4                |
|                |                                                        | R      | TGCCCTGAGGGTAGAAGGC      | No                |                     |
| <i>Mat2a</i>   | methionine adenosyltransferase II, alpha               | F      | CAGGAGACCAGGGTTTGATGTT   | Yes               | 95.8                |
|                |                                                        | R      | GCGTAACCAAGGCAATGTACC    | No                |                     |
| <i>Mtr</i>     | methionine synthase                                    | F      | CTGCAGATGTGGCCAGAAAAG    | No                | 98.9                |
|                |                                                        | R      | CAGCCACAAACCTCTTGACTCC   | Yes               |                     |
| <i>Pcyt1a</i>  | Phosphate cytidyltransferase 1, choline, alpha isoform | F      | GAAGAGCATCGACCTCATCCA    | No                | 101.3               |
|                |                                                        | R      | CTTCAGCATGTGCTTCAGTGC    | Yes               |                     |
| <i>Pemt</i>    | phosphatidylethanolamine N-methyltransferase           | F      | TACTTCCTGGGCCTTGCAATC    | No                | 100.1               |
|                |                                                        | R      | ACGCTGAAGGGAAATGTGGTC    | No                |                     |

**Figure S3:** Features view showing distribution before and after normalization. Density plots represent all features. Boxplots display distribution for only 50 features due to limited space.

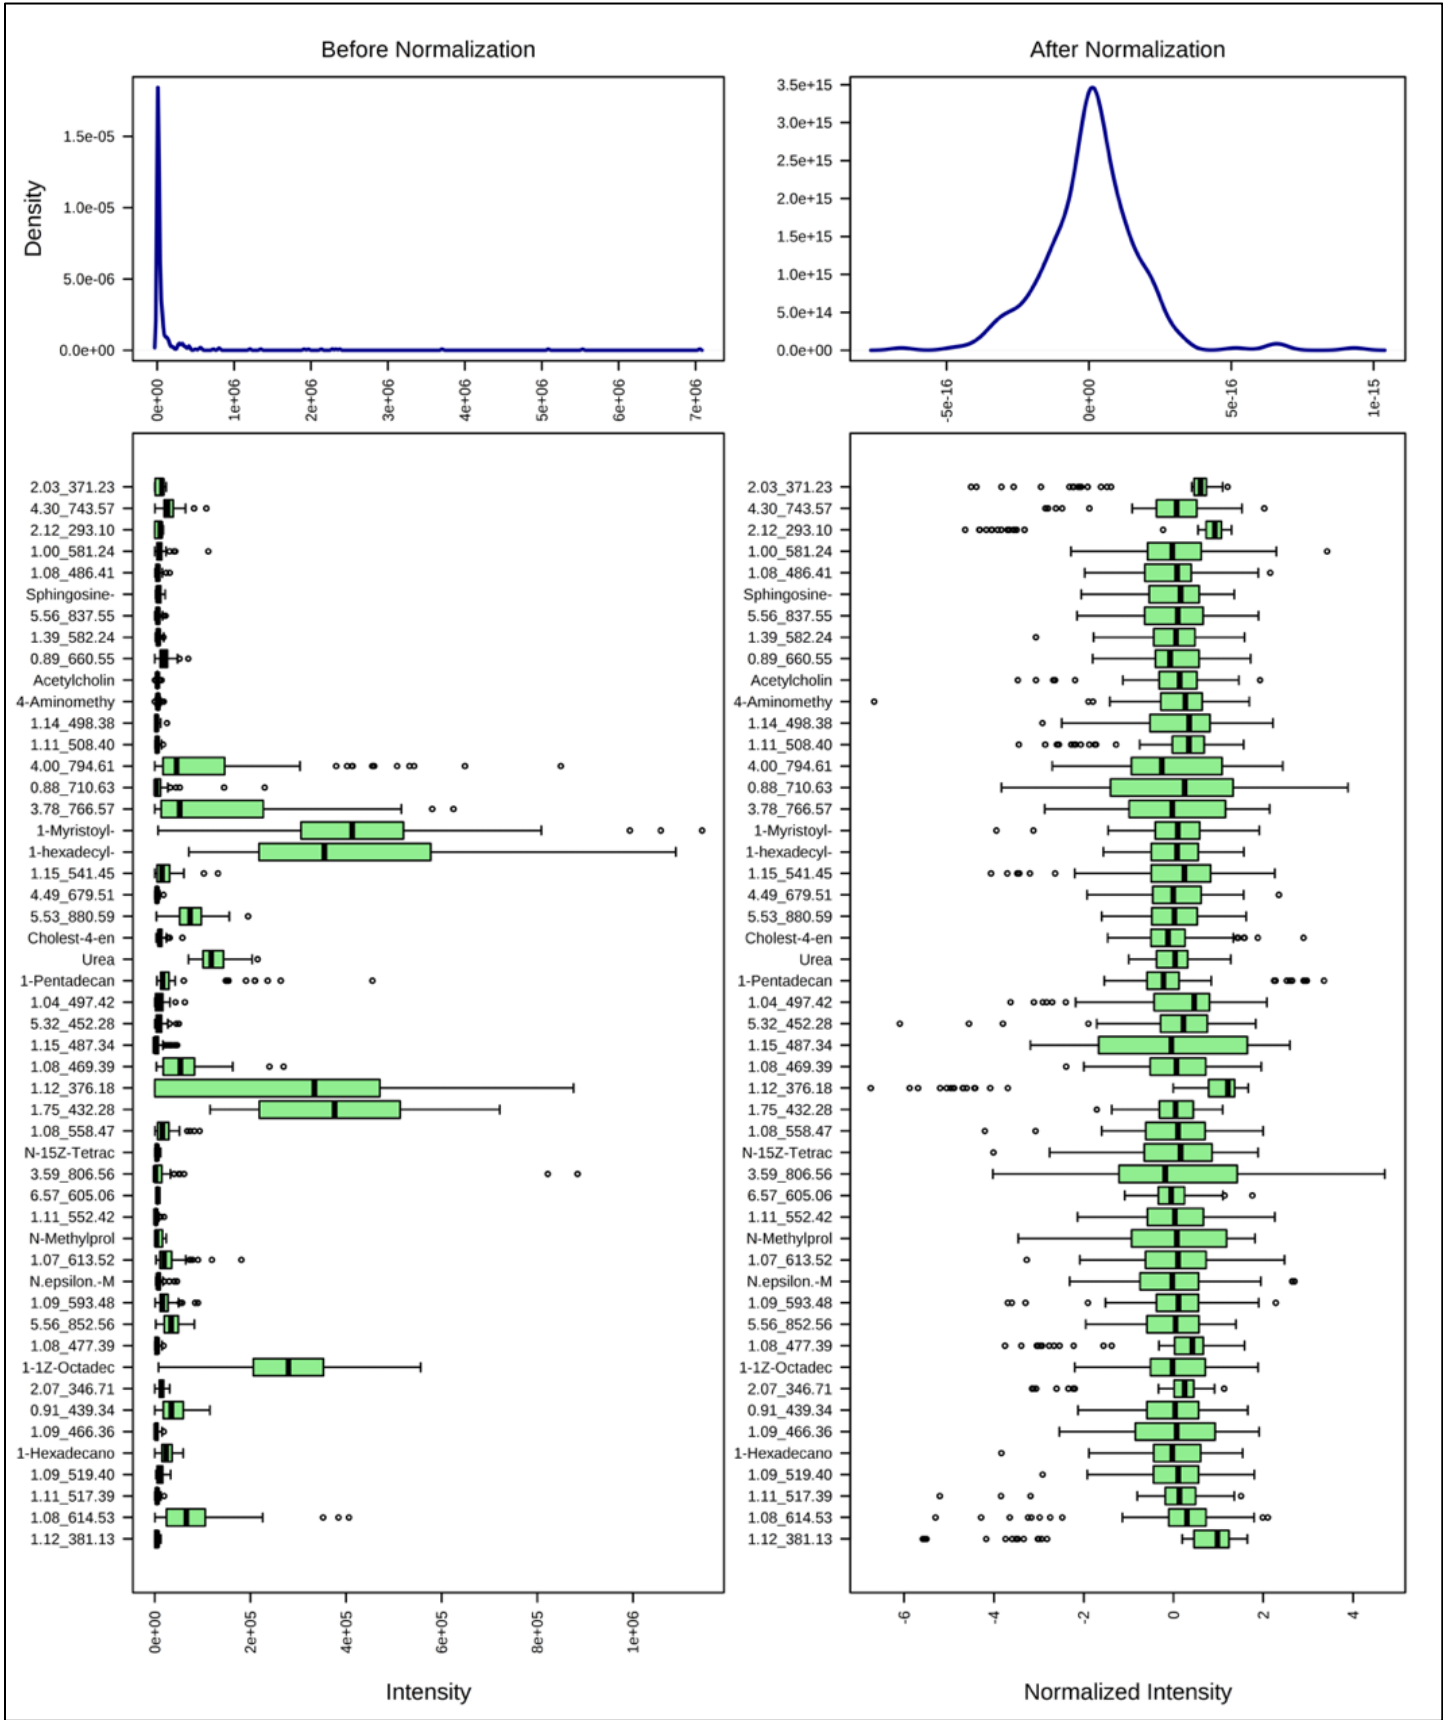

Supplement: s1 [file s1]
